# 1 Genomic signatures of host-specific selection in a parasitic 2 plant

3  
4 **Authors:** Emily S. Bellis<sup>1,2,3</sup>, Clara S. von Münchow<sup>4</sup>, Calvins O. Odero<sup>5</sup>, Alan Kronberger<sup>1</sup>,  
5 Elizabeth Kelly<sup>3</sup>, Tian Xia<sup>3</sup>, Xiuzhen Huang<sup>1,2</sup>, Susann Wicke<sup>4,5</sup>, Steven M. Runo<sup>6</sup>, Claude W.  
6 dePamphilis<sup>3</sup>, Jesse R. Lasky<sup>3</sup>

7  
8 **Target journal:** AJB

9  
10 **Corresponding Author:** Emily S. Bellis, [ebellis@astate.edu](mailto:ebellis@astate.edu)

11  
12 <sup>1</sup>Department of Computer Science, Arkansas State University, State University, AR, USA

13 <sup>2</sup>Center for No-Boundary Thinking, Arkansas State University, State University, AR, USA

14 <sup>3</sup>Department of Biology, Pennsylvania State University, University Park, PA, USA

15 <sup>4</sup>Institute for Biology, Humboldt University of Berlin, Berlin, Germany

16 <sup>5</sup>Späth-Arboretum of the Humboldt University of Berlin, Berlin, Germany

17 <sup>6</sup>Department of Biochemistry, Microbiology, and Biotechnology, Kenyatta University, Nairobi,  
18 Kenya

19  
20 Manuscript received: \_\_\_\_\_; revision accepted: \_\_\_\_\_.

21  
22 Running head: *Striga hermonthica* population genomics

## 23 ABSTRACT

24 **Premise**—Parasitic plants and their hosts are emerging model systems for studying  
25 genetic variation in species interactions across environments. The parasitic plant *Striga*  
26 *hermonthica* (witchweed) attacks a range of cereal crop hosts in Africa. *Striga hermonthica*  
27 exhibits substantial genetic variation in host preference and in specificity versus generalism.  
28 Some of this variation is locally adapted, but the genetic basis of specialization on certain hosts  
29 is unknown.

30 **Methods**—We present an alignment-free analysis of population diversity in *S.*  
31 *hermonthica* using whole genome sequencing (WGS) data for 68 individuals from western  
32 Kenya. We validate our reference-free approach with germination experiments and a *de novo*  
33 assembled draft genome.

34           **Results**—*K*-mer based analyses reveal high genome-wide diversity within a single field,  
35 similar to values between individuals collected 100 km apart or farther. Analysis of host-  
36 associated *k*-mers implicated genes involved in development of the parasite haustorium (a  
37 specialized structure used to establish vascular connections with host roots) and a potential role  
38 of chemocyanins in molecular host-parasitic plant interactions. Conversely, no phenotypic or  
39 genomic evidence was observed suggesting host-specific selection on parasite response to  
40 strigolactones, hormones exuded by host roots and required for parasite germination.

41           **Conclusions**—This study demonstrates the utility of WGS for plant species with large,  
42 complex genomes and no available reference. Contrasting with theory emphasizing the role of  
43 early recognition loci for genotype specificity, our findings support host-specific selection on  
44 later interaction stages, suggesting recurring host-specific selection each generation alternating  
45 with homogenizing gene flow.

46

47 **Key words:** population genomics, recurrent selective sweeps, agroecosystems,  
48 Orobanchaceae, host-parasite coevolution, chemocyanin

## 49 **INTRODUCTION**

50           Characterizing the genomic basis of adaptation to local biotic environments is a key  
51 challenge for evolutionary ecology (Ebert and Fields, 2020). Parasites and mutualists exert  
52 strong influences on host fitness, and may even constitute the predominant selective pressure  
53 shaping patterns of local adaptation in some systems (Fumagalli et al., 2011; Castellano et al.,  
54 2019). Compared to abiotic environmental gradients, adaptation to biotic environments may be  
55 characterized more frequently by selection on fewer mutations of large effect, due to selection  
56 on a more rapidly changing adaptive landscape (Wilfert and Schmid-Hempel, 2008; Louthan  
57 and Kay, 2011). However, many host-parasite and host-mutualist systems involve a complex

58 multi-step infection process including many stages of interaction between host and symbiont  
59 derived molecules (Hall et al., 2017).

60 An outstanding question is whether adaptation to local biotic environments occurs most  
61 often via selection on genes involved during initial infection stages, or whether genetic variation  
62 at later stages of the interaction is also frequently maintained. The expectation from theoretical  
63 studies is that initial recognition loci are more likely than downstream effector loci to contribute  
64 to host genotype by parasite genotype interactions ( $G_H \times G_P$ ) and correspondingly, local  
65 adaptation (Nuismer and Dybdahl, 2016). The first prediction, that recognition loci contribute  
66 more to  $G_H \times G_P$ , is supported by empirical studies of the waterflea *Daphnia magna* and its  
67 bacterial parasite *Pasteuria ramosa* (Hall et al., 2017). In this system, most of the genetic  
68 variance in parasite infection was associated with a single major effect QTL linked to the early  
69 stage of parasite attachment (Hall et al., 2019). In contrast, many different QTLs of smaller  
70 effect were associated with later stages, highlighting the potential for independent evolution of  
71 traits involved in different stages of the infection process (Hall et al., 2019). Supporting the  
72 second prediction that selection on recognition traits often underlies local adaptation (Nuismer  
73 and Dybdahl, 2016), studies of plant pathosystems have revealed reciprocal coevolutionary  
74 selection on host resistance (R) genes and parasite avirulence genes, for example in the flax-  
75 flax rust system (Ravensdale et al., 2011; Thrall et al., 2012). However, a high degree of  
76 genotype specificity has also been observed for many host-parasite systems characterized by  
77 more quantitative mechanisms of resistance (Poland et al., 2009). For host-parasite interactions  
78 characterized by quantitative genetic architectures, we still know little regarding the genetic  
79 basis of local adaptation in natural populations and the extent to which initial vs. later infection  
80 stages contribute to  $G_H \times G_P$ .

81 An emerging model system for studying spatial pattern and process in coevolutionary  
82 genomics is the parasitic plant *Striga hermonthica* and its cereal hosts. In contrast to *Striga*  
83 *gesnerioides*, which parasitizes cowpea via a qualitative gene-for-gene mechanism, host

84 resistance to *S. hermonthica* is highly polygenic (Li and Timko, 2009; Timko et al., 2012) with at  
85 least one large effect locus (Gobena et al., 2017). *Striga hermonthica* parasitizes grass hosts  
86 including sorghum, maize, rice, and millets and is one of the greatest biotic constraints to food  
87 security in Africa (Ejeta, 2007; Spallek et al., 2013; Savary et al., 2019). An individual *S.*  
88 *hermonthica* plant can produce thousands of seeds that may survive in the soil for a decade or  
89 more under optimal conditions (Bebawi *et al.* 1984; but see Gbèhounou *et al.* 2003).

90 Parasite seeds germinate by detecting strigolactones (SLs), hormones exuded from host  
91 roots under nutrient-deficient conditions that also stimulate host interactions with beneficial  
92 mycorrhizal fungi (Akiyama et al., 2005). Parasite perception of SLs is mediated through binding  
93 to paralogs of KARRIKIN INSENSITIVE 2 (KAI2), known as HYPOSENSITIVE TO LIGHT (HTL)  
94 proteins. SL receptors of the *KAI2d* clade rapidly expanded and diversified during the transition  
95 to parasitism in the Orobanchaceae, a plant family that includes thousands of mostly parasitic  
96 species (Conn et al., 2015). For example, the ~600 Mb genome of *Striga asiatica* contains 21  
97 *KAI2* genes, many of which occur as tandem duplications (Yoshida et al., 2019). *Striga*  
98 *hermonthica* may contain 13 or more *KAI2* paralogs (Nelson, 2021), including 11 for which the  
99 binding affinity for diverse SLs has been extensively characterized (Toh et al., 2015; Tsuchiya et  
100 al., 2015). The continent-wide distribution of host-specific *S. hermonthica* populations suggests  
101 adaptation to their local host communities, via generalization where diverse hosts are available  
102 and specialization where a particular host is common (Bellis et al., 2021). Given the low  
103 germination of millet- and sorghum-specific *S. hermonthica* populations in response to root  
104 exudates from the alternate host (Parker and Reid, 1979), it is possible that at least some of this  
105 host-specificity results from natural selection on SL perception. Host-specific germination of  
106 *Striga* species could result from expanded SL response by different *KAI2* paralogs, or  
107 evolutionary fine-tuning of SL perception if some SL receptors instead function to inhibit  
108 germination (Nelson, 2021).

109           Following SL perception and parasite germination, host-derived phenolic compounds  
110 induce formation of the haustorium, the specialized multicellular feeding structure used by  
111 parasitic plants to invade host tissues (Cui et al., 2018). Intrusive cells of the haustoria invade  
112 host tissues to form direct connections with host vasculature (Masumoto et al., 2021). Water,  
113 nutrients, and other molecules including mRNA (Kim et al., 2014), small RNA (Shahid et al.,  
114 2018), DNA (Yang et al., 2019), and proteins (Liu et al., 2020; Shen et al., 2020) are directly  
115 transferred through haustorial connection. In addition to natural variation in low germination  
116 stimulation (Dayou et al., 2021; Mallu et al., 2021), post-germination host resistance in *Striga*  
117 *hermonthica* is often apparent across diverse hosts, for example due to induction of an intense  
118 hypersensitive response, formation of a mechanical barrier, or failure of the parasite to form  
119 vascular connections (Mbuvi et al., 2017; Mutinda et al., 2018; Kavuluko et al., 2020). Much of  
120 this genetic variation in natural resistance may result from host populations' local adaptation to  
121 parasitism across the range of *Striga hermonthica* (Bellis et al., 2020).

122           Extensive genetic and germplasm resources have enabled broad-scale studies of local  
123 adaptation in *Striga* hosts (Bellis et al., 2020), but understanding reciprocal adaptation in  
124 parasite populations is challenged by paucity of genomic data for *S. hermonthica*. At the  
125 population-scale, restriction-site associated DNA sequencing (RAD-Seq) and analysis of  
126 polymorphism in transcriptomes have begun to shed light on population level diversity in these  
127 parasites (Unachukwu et al. 2017; Lopez et al. 2019). However, reduced representation  
128 approaches pose difficulties if only a fraction of host genome diversity is tagged by RAD-Seq  
129 markers (Lowry et al., 2017) or (in the case of transcriptomes) if genes under selection are not  
130 expressed in sequenced tissues. Like other parasitic angiosperms, *S. hermonthica* is  
131 characterized by a larger genome than non-parasitic relatives (Lyko and Wicke, 2021), with  
132 estimated size of ~1 Gb (1C = 0.9 Gb; Yoshida et al. 2010) or greater (1C = 1.4 Gb; Estep et al.  
133 2012). *Striga hermonthica* is a highly heterozygous obligate outcrosser, posing additional  
134 challenges for genome assembly and reference-based approaches. Here, we provide a

135 reference-free analysis of population-scale diversity in *S. hermonthica*, based on whole genome  
136 sequencing (WGS) data. Using a unique alignment-free bioinformatic approach, we identify  
137 genetic variation associated with host-specific parasitism in natural populations and investigate  
138 signatures of selection surrounding these loci. Based on these findings, we evaluate the  
139 hypothesis that adaptation to local host populations results from selection on genes involved in  
140 early stages of the interaction (SL perception) against the alternative that selection on genes  
141 involved in later stages is primarily responsible.

142

## 143 **MATERIALS AND METHODS**

144 **Sample Collection**—Seeds and leaf tissue were collected from *S. hermonthica*  
145 individuals in July 2018 from six locations in western Kenya (Table S1). Two plots with *S.*  
146 *hermonthica* parasitizing different host species were sampled at each location, chosen as close  
147 as possible and in most cases, from nearby plots on the same farm (i.e. within 15 meters). Per  
148 plot, twelve *S. hermonthica* individuals were chosen haphazardly, with effort taken to sample  
149 individuals distributed evenly throughout the plot. This sampling design was expected to result  
150 in the selection of individuals from the same interbreeding population that are relatively  
151 homogeneous across their genetic background due to high rates of gene flow among  
152 neighboring plots. However, sampling mature plants could allow for identification of loci under  
153 selection for parasitism on a specific host due to a single generation of selection. Individuals  
154 were photographed before collection and images for representative individuals at each site  
155 uploaded to iNaturalist. Three to four leaves per individual were sampled directly into silica gel,  
156 before collection of the whole individual into separate paper bags. Plants were dried in paper  
157 bags before harvesting and manual cleaning of seeds. Cleaned seeds were shipped to Penn  
158 State for germination rate experiments and stored in individual 2 mL microcentrifuge tubes at  
159 room temperature prior to experiments. Five voucher specimens (ESB collection numbers  
160 2018.1 to 2018.5) were deposited in the collection of the East African Herbarium (EA).

161

162           **Whole genome sequencing**—For samples collected in 2018, whole genome  
163 sequencing was performed for a subset of 68 *S. hermonthica* individuals. This included all 24  
164 individuals collected from adjacent plots of finger millet and maize in Kisii, all 24 individuals  
165 collected from adjacent plots of sorghum and maize in Homa Bay, and five individuals (two or  
166 three per plot) from four additional locations. DNA was extracted from silica-dried leaf tissue in  
167 the USDA APHIS quarantine facility at the Pennsylvania State University using the E.Z.N.A.  
168 Plant DNA DS Mini Kit (Omega Bio-tek, Norcross, Georgia, USA) according to the  
169 manufacturer's protocol. Genomic library preparation and paired-end 150 bp sequencing was  
170 carried out by the Texas A&M AgriLife Genomics and Bioinformatics Service, on a single lane of  
171 a NovaSeq 6000 S4 flow cell.

172

173           **Population structure**—We followed a reference-free approach to evaluate population  
174 genomic patterns among sequenced samples. Raw reads that could be classified as plant-  
175 derived were identified using Kraken 2 (Wood et al., 2019), based on a custom database built  
176 from the complete set of plant genomes and proteins in the NCBI RefSeq collection, sequences  
177 from 472 Mbp of the *Striga asiatica* genome (Yoshida et al., 2019) and *S. hermonthica*  
178 transcriptome sequences (build StHeBC4) from the Parasitic Plant Genome Project II (Yang et  
179 al., 2014). Classified sequences were trimmed using BBduk from BBTools (Bushnell, n.d.),  
180 removing sequence on the ends of reads with low quality (qtrim=rl trimq=20 minlen=50) or 3'  
181 matches to adapters (k=23 mink=11 hdist=1 tpe tbo ktrim=r). To reduce bias associated with  
182 differences in per-sample read depth, reads were downsampled to 5.2 Gbp with BBTools  
183 Reformat.

184           *Mash*, a dimensionality reduction technique based on the MinHash algorithm, was used  
185 to estimate genetic distance between samples based on resulting read sets (Ondov et al.,  
186 2016). *Mash* previously showed improved performance compared to alignment-based methods

187 for estimating pairwise genetic distance for polyploid plant genomes using simulated and real  
188 data (VanWalleendael and Alvarez, 2020). We used a  $k$ -mer size of 31, removing  $k$ -mers with  
189 less than 2 copies but increasing the sketch size to  $1 \times 10^7$  to account for a larger volume of  
190 input data. Principal Coordinates Analysis was performed in R version 4.0 with the `pcoa` function  
191 of the 'ape' package (Paradis and Schliep, 2019). A smaller  $k$ -mer size ( $k=21$ ) was also tested  
192 but did not alter clustering patterns in PCoA. Correlation between the genetic distance matrix  
193 and the geographic distance matrices, calculated with 'geodist', was determined using a Mantel  
194 test (Padgham and Sumner, 2021).

195

196 **Germination experiments**—Seed germination was assayed in the USDA-APHIS-  
197 permitted quarantine lab at Pennsylvania State University (permit no. P526P-21-04540). A  
198 detailed step-by-step protocol is available from protocols.io repository (Bellis and Kelly, 2019),  
199 following the modifications for testing seeds collected from individual plants. Briefly, seeds were  
200 surface sterilized for 10 minutes in 1.5 mL microcentrifuge tubes with a 0.5% sodium  
201 hypochlorite solution before preconditioning for 12 days at 30°C in separate wells of foil-  
202 wrapped 12-well culture plates, with three technical replicates per unique germination stimulant  
203 and parasite genotype combination. Germination counts were performed 3 days after addition of  
204 germination stimulants. Tested germination stimulants included (+)5-deoxystrigol (Olchemim,  
205 Olomouc, Czech Republic; CAS: 151716-18-6) or (±)orobanchol (Olchemim; CAS: 220493-64-1)  
206 at 0.01  $\mu$ M and (±)-GR24 (Chempep, Wellington, Florida, USA; CAS: 76974-79-3) at 0.2  $\mu$ M.  
207 GR24 is a synthetic strigolactone analog commonly used in laboratory germination studies of  
208 parasitic plants as a positive control. 5-deoxystrigol is one of the major SLs produced by  
209 compatible grass hosts (Awad et al., 2006) and is a potent stimulator of parasite germination  
210 whereas orobanchol is a more dominant SL among dicot hosts (Yoneyama et al., 2008) and is a  
211 less potent stimulator of *S. hermonthica* germination for certain genotypes (Cardoso et al.,  
212 2014). Specifically, *S. hermonthica* tested populations from Mali and Niger germinate poorly in



213 response to orobanchol (Hausmann et al., 2004; Bellis et al., 2020) whereas Kenyan *S.*  
214 *hermonthica* show a greater ability to germinate in response to exudate from sorghum hosts  
215 carrying loss-of-function mutations at the sorghum resistance locus *LOW GERMINATION*  
216 *STIMULANT 1 (LGS1)*, which results in high amounts of orobanchol rather than 5-deoxystrigol  
217 in root exudates (Gobena et al., 2017).

218 In addition to seed collections kept separately from individual plants, we also included  
219 tests of bulk seed collected from the Kibos population that were confirmed to have high  
220 germinability in our previous experiments (Bellis et al., 2020). We used a generalized linear  
221 mixed model (GLMM) with a random effect of *S. hermonthica* genotype (of the parent plant) to  
222 compare differences in germination rate among sites, hosts, and treatments (orobanchol vs. 5-  
223 deoxystrigol). GLMMs were implemented in R version 4.0 with the lme4 package (Bates *et al.*  
224 2015).

225  
226 ***Host-specific differentiation***—We next sought to identify particular genomic regions  
227 differentiated between parasites growing on different hosts. This analysis targeted parasite  
228 populations from Homa Bay or Kisii, for which we sequenced DNA from parasites for two  
229 different hosts on the same farm from immediately adjacent plots. For the Kisii population, the  
230 dataset included individuals from finger millet and maize, whereas for the Homa Bay population  
231 the dataset included parasites from sorghum and maize ( $n = 12$  from each host species; 48  
232 individuals total). Counts for  $k$ -mers of length 31 were summarized across sequenced  
233 individuals using HAWK (Rahman et al., 2018) and used to calculate the fixation index,  $G_{ST}$  (Nei  
234 and Chesser, 1983), for each  $k$ -mer using custom Python scripts.  $G_{ST}$  is a generalization of the  
235 widely used fixation index  $F_{ST}$  applicable to non-diploid loci (Nei, 1973). To extend  $G_{ST}$  to our  
236 reference-free genotyping approach, at each  $k$ -mer we considered two allelic states (present or  
237 absent) where the  $k$ -mer was marked as present in an individual if it was counted at least once  
238 or absent if it was not observed at all.

239 To gather functional information for host-associated  $k$ -mers, 31-mers with  $G_{ST}$  above 0.5  
240 were extracted and assembled into longer contigs using ABYSS 2.0.2, specifying a  $k$ -mer length  
241 of 29 for assembly (Jackman et al., 2017). Assembled contigs were then queried against contigs  
242 from two published *S. hermonthica* transcriptome assemblies using BLAST optimized for short  
243 sequences (blastn-short). Transcriptome assemblies in our BLAST database included StHeBC4  
244 (265,694 scaffolds covering 369.7 Mb) from the Parasitic Plant Genome Project (Westwood et  
245 al., 2012) and Sh14v2 (81,559 scaffolds covering 83.9 Mb) from Yoshida *et al.* (2019).  
246 Annotations are based on the top hit from the Sh14v2 transcriptome.

247 Contigs assembled from host-associated  $k$ -mers were further studied by mapping  
248 cleaned sample reads to mRNA reference sequences, following the strategy from (Therkildsen  
249 and Palumbi, 2017). Mapping to a transcriptome reference has the potential to introduce errors  
250 in SNP calling due to intron/exon boundaries and the short length of transcripts, so we restricted  
251 this analysis to a small set of loci for which alignments could be manually inspected. Sequences  
252 in our reference included three transcripts with potential functions in haustorium development  
253 (StHeBC4\_h\_c11261\_g0\_i1, StHeBC4\_p\_c12587\_g2\_i1, StHeBC4\_u\_c12903\_g27039\_i4; see  
254 Results). The reference also included transcript sequences for a set of 11 previously  
255 characterized *S. hermonthica* strigolactone receptors [GenBank accession numbers KR013121  
256 - KR13131] (Tsuchiya et al., 2015). High quality, contaminant-filtered reads were mapped to the  
257 reference transcriptome using BWA-MEM (Li, 2013), and alignments with low quality were  
258 removed using samtools view (-q 20) (Li et al., 2009). Allele frequencies for each site in the  
259 reference transcriptome were estimated based on genotype likelihoods using ANGSD, ignoring  
260 low quality bases (-minQ 25) and allowing reads for which only one end mapped (-  
261 only\_proper\_pairs 0) (Kim et al., 2011; Korneliussen et al., 2014). Sites with information for  
262 fewer than nine of twelve individuals in the population were excluded, and the difference in  
263 estimated allele frequency between parasite populations on different hosts was visualized with  
264 R version 4.0 (R Core Team, 2020). This strategy was used to filter false SNP calls due to

265 errors in mapping DNA-derived reads to a transcriptome reference, since these SNPs should be  
266 observed as a fixed difference from the reference that occurs in both populations. We further  
267 investigated genes with potential structural variation by extracting reads aligned to the transcript  
268 reference and their unmapped pairs and reassembling them with ABYSS (k=51) (Jackman et  
269 al., 2017).

270

271 **Validation of k-mer-based approaches**—To investigate patterns of selection  
272 surrounding putative host-associated loci and validate findings from reference-free analyses, we  
273 also mapped reads generated for *S. hermonthica* to a draft reference assembled specimen,  
274 grown *ex situ* from seeds collected on maize in the Irimbi district of Southern Uganda  
275 (specimens voucher deposited at MSUN). DNA was extracting from developing leaves and  
276 inflorescences of one individual using a modified 1x CTAB-protocol with subsequent PEG-8000  
277 precipitation and purification (Wicke et al., 2016). Genomic libraries were sequenced on an  
278 Illumina HiSeq 2000 in 101 bp paired-end mode at Eurofins GATC Biotech GmbH (Constance,  
279 Germany). Additional data were generated to a targeted depth of 110X using the HiSeq 2500  
280 platform using the HiSeq SBS Kit v4 at Eurofins GATC Biotech GmbH, for which DNA from the  
281 original extract was subjected to  $\Phi$ 29-polymerase based whole-genome amplification. Whole  
282 genome-amplified DNA was size-selected for >20 kb fragments on 1% low-melting point  
283 agarose and purified using an agarose digest-based purification from gel with subsequent  
284 ethanol/sodium acetate precipitation (Wicke et al., 2013). For the final assembly, we employed  
285 Trimmomatic v0.36 (Bolger et al., 2014) to remove adapters and retain only sequences longer  
286 than 36 bp with an average per-base quality above 15 ("ILLUMINACLIP:TruSeq3-PE.fa":  
287 2:30:10 SLIDINGWINDOW:4:15 MINLEN:36). The quality-trimmed data were assembled using  
288 SPAdes v3.10.1 with *k*-mer sizes of 21, 33, 55, and 77 (Bankevich et al., 2012). Assembly  
289 quality was ascertained using Quast v4.5 (Gurevich et al., 2013) with default parameters for  
290 eukaryotes. The resulting assembled contigs were contaminant-filtered, for which we ran a

291 nucleotide BLAST search of all contigs against the non-redundant nucleotide database (access  
292 date: 10.07.2017) using BLAST+ v2.6 with an e-value of  $1E10^{-4}$ . Only contigs with the three best  
293 hits matching to green land plants (Viridiplantae) were retained.

294 After removing scaffolds shorter than 500 bp from the reference, high quality sequences  
295 from each *S. hermonthica* individual were mapped using BWA-MEM v0.7.17 (Li, 2013).  
296 Sequences mapping with quality less than 20 were excluded using SAMtools v1.10 (Li et al.,  
297 2009). Tajima's D was calculated in non-overlapping windows of 1-kb using ANGSD v0.935  
298 based on the folded site frequency spectrum and including reads where only one end mapped (-  
299 only\_proper\_pairs 0), to account for the highly fragmented nature of the assembly (Korneliusson  
300 et al., 2014).  $F_{ST}$  was also calculated in non-overlapping windows with ANGSD, using the  
301 SAMtools method for calculating genotype likelihoods. Genome-wide mean values of Tajima's D  
302 were determined by fitting an intercept-only linear mixed model to window estimates of  $F_{ST}$  or  
303 Tajima's D, including a random effect of 'contig' to account for increased correlation among  
304 measurements from nearby genomic regions, with the R package lme4 (Bates et al., 2015). An  
305 empirical *P*-value for Tajima's D for the contig containing the chemocyanin was calculated  
306 based on the number of 10,000 randomly sampled windows of size matching the assembled  
307 length of the contig (1-kb) with values more extreme than the observed value.

308 To validate the presence/absence polymorphism for the chemocyanin gene, we  
309 performed PCR using primers designed from the reassembled 'finger millet' allele (Primer Set A:  
310 5'-AAGATTGCGGTTACCACCAG-3' and 5'-TCTCGATCCTTTTGAATGG-3') and the  
311 transcript reference (Primer Set B: 5'- CAGGAGCAAGTAGAGTAGAGCA-3' and 5'-  
312 TGGGGAAAGAGGTAGTGCAA-3'). PCR was performed with DreamTaq DNA Polymerase 2x  
313 Mastermix (ThermoFisher, Waltham, Massachusetts, USA) under the following cycling  
314 conditions: 95°C for 3 min; 30 cycles of 95°C (30 s), 50.3°C (30 s), 72°C (60 s); 72°C for 5 min.

315

## 316 RESULTS

317           **Sequencing**—For the 68 Kenyan samples, on average 80% of reads per library were  
318 classified as plant-derived using Kraken 2 (range: 71-86%). The majority of classified reads  
319 matched the *S. hermonthica* transcriptome (mean: 46%) or the *S. asiatica* genome (mean:  
320 30%). After quality and adapter trimming, on average 7.7 Gigabase pairs of plant-derived  
321 sequence data remained per sample (range: 5.2-11.7 Gbp). Given flow cytometry estimates of  
322 the genome size of *S. hermonthica* ranging from 1C = 0.9 Gb (Yoshida et al., 2010) to 1C = 1.4  
323 Gb (Estep et al., 2012), this sequencing effort corresponds to an approximate average depth of  
324 5.5x to 8.6x read coverage per base for each sample.

325  
326           **Population structure**—In contrast to previous studies based on microsatellite markers  
327 (Gethi et al., 2005) but consistent with results from GBS (Unachukwu et al., 2017), our analyses  
328 suggest that geography is a primary factor shaping population structure in *S. hermonthica* from  
329 western Kenya. Principal Coordinates Analysis (PCoA) based on *k*-mers indicated high genetic  
330 diversity within populations, with only subtle differentiation of populations from the same farm  
331 collected from different hosts (Fig. 1). Greater correlation was observed between genetic and  
332 geographic distance than expected by chance ( $p = 0.001$ , Mantel test), and patterns of genetic  
333 variation were consistent with those expected under isolation by distance (Fig. 1F). Although  
334 populations were structured by distance, within-population diversity was very high at the  
335 geographic scale investigated. Many individuals exhibited a comparable range of pairwise  
336 genetic diversity within a single field (*k*-mer distance ranging from 0.0216 - 0.0286;  $n = 572$   
337 pairwise comparisons) as between individuals sampled more than 100 km apart (*k*-mer distance  
338 ranging from 0.0242 - 0.0286;  $n = 336$  pairwise comparisons; Fig. 1F).

339  
340           **Germination rate variation**—Previous studies have suggested that in contrast to other  
341 locations in Africa, *S. hermonthica* populations from western Kenya demonstrate a generalist  
342 germination response to strigolactones (Hausmann et al., 2004; Bellis et al., 2020). However,

343 *Striga* germination tests are typically conducted with bulk seeds collected from many individuals  
344 in a field, potentially masking individual-level variation that could be segregating with respect to  
345 parasitism on different hosts, for example if a generalist population is composed of individuals  
346 that specialize on different resources (Bolnick et al., 2002).

347 To characterize individual-level variation in western Kenyan *S. hermonthica*, we  
348 conducted controlled germination tests in the USDA-permitted quarantine facility at  
349 Pennsylvania State University. Positive controls with bulk seed (collected in the Kibos region)  
350 and 0.2  $\mu\text{M}$  of the artificial strigolactone GR24 indicated good germinability for positive controls  
351 (66.5%), and no germinated seeds were observed in wells with only sterile water. Compared to  
352 the higher concentration of GR24, bulk seed showed slightly lower germination rates in  
353 response to 0.01  $\mu\text{M}$  of the natural SLs orobanchol (51.0%) and 5-deoxystrigol (55.7%)  
354 indicating that the concentrations of orobanchol and 5-deoxystrigol used in the individual-level  
355 experiment should produce strong but sub-maximal germination responses.

356 We did not find significant host-associated germination variation among seeds collected  
357 from individual parasites on different hosts (Table S1; Fig. 2). After accounting for treatment and  
358 site, host-of-origin was not a statistically significant effect in our model ( $P = 0.247$ ; likelihood  
359 ratio test for test of full vs. reduced GLMM). Comparing individuals from Kisii to Homa Bay, the  
360 probability of germination was 30% lower ( $P = 0.04$ ; GLMM with fixed effects of 'Site' and  
361 'Treatment') and 15% lower in response to orobanchol than to 5-deoxystrigol ( $P = 0.004$ ;  
362 GLMM).

363

364 ***Host-associated loci***—Germination tests did not support host-specific differences in  
365 strigolactone response in these populations. However, it is possible that host-specific selection  
366 could still leave detectable signatures at the genetic level. We identified host-associated genetic  
367 variation without a reference using a  $k$ -mer based approach. Highly differentiated  $k$ -mers were  
368 defined as those having  $G_{ST} > 0.5$  (Fig. S2). A greater proportion of 31-mers were highly

369 differentiated for parasites on finger millet vs. maize hosts in Kisii (4.8% of 31-mers) compared  
370 to sorghum vs. maize hosts in Homa Bay (0.6% of 31-mers; Fig. S1).

371 Highly differentiated 31-mers were then assembled into longer contigs for follow-up  
372 analysis. For the Homa Bay population (maize vs. sorghum hosts), 42 contigs were assembled  
373 ranging in length from 58 to 91 bp. Sixteen of these contigs had good BLAST hits to the  
374 transcriptome database, with >85% identity over at least 45 bp (Table 1). For the Kisii  
375 population (finger millet vs. maize hosts), highly differentiated *k*-mers assembled into 469  
376 contigs with length ranging from 29 to 211 bp. Of these, 241 had good BLAST hits to transcripts  
377 in our database (Table S2).

378 Of particular interest to our investigation were host-specific contigs with high levels of  
379 similarity to known *Striga* parasitism genes including SL receptors and genes involved in  
380 haustorium development. We first searched for similarity to a set of 11 *S. hermonthica*  
381 strigolactone receptors that vary in their binding affinity for diverse strigolactones [GenBank  
382 accession numbers KR013121 - KR13131] (Tsuchiya et al., 2015). We observed only one likely  
383 spurious match to *ShHTL2* (87% similarity over 23 bp) and no hits to any of the 21 *KAI2*  
384 paralogs from the *Striga asiatica* genome (Yoshida 2019). In follow-up analyses based on  
385 alignments to reference *ShHTL* transcripts, only one site in *ShHTL6* had an estimated difference  
386 in allele frequency between parasites on finger millet and maize exceeding 0.5 (Fig. S2). This  
387 polymorphism occurred at position 457 and does not result in an amino acid change. Together,  
388 we find little phenotypic or genomic evidence supporting host-specific differentiation for loci  
389 involved in perception of strigolactones in these populations.

390 In contrast, several assembled host-specific contigs had good matches to loci implicated  
391 in development of haustoria (Fig. 3). Annotated transcripts included a 60 bp contig with >98%  
392 similarity over its full length to a transcript annotated as *SUPPRESSOR OF G2 ALLELE SKP1*  
393 (*SGT1*) (Table S1). *SGT1* was among the top upregulated genes in haustoria of the root  
394 parasitic plant *Thesium chinense* and was hypothesized to be important for generating auxin

395 response maxima during haustorium development (Ichihashi et al., 2017). In *S. hermonthica*, it  
396 is also highly expressed in imbibed seeds (Stage 0) and in haustoria attached to host roots  
397 (Stage 3; Fig. 3D). Parasitism on different hosts was associated with genetic structural variation  
398 in *SGT1*, with two <100 bp regions often absent from parasites on sorghum but present for  
399 parasites on maize and finger millet. We also identified a 59 bp contig with 96% similarity over  
400 its full length to a transcript annotated as a pectin methylesterase; pectin methylesterases have  
401 previously well-characterized functions in developing haustoria (Yang et al., 2014). The pectin  
402 methylesterase transcript was not expressed in parasites grown on sorghum in most stages, but  
403 exhibited low, non-zero expression in *S. hermonthica* seedlings after exposure to a haustorium  
404 inducing factor (mean TPM = 0.03). We did not identify evidence for structural variation in this  
405 gene in transcript-aligned reads, though strong differentiation between individuals from finger  
406 millet (AF = 0.65) and maize (AF = 0.03) verified the signal observed from the *k*-mer association  
407 analysis.

408         Two additional assembled host-differentiated contigs of 113 bp and 103 bp had 99% and  
409 97% similarity, respectively, over their full length to separate regions of a single transcript  
410 annotated as a precursor of chemocyanin (Table S2). Chemocyanins may be of particular  
411 interest due to the evolutionary co-option of many pollen tube genes by parasitic plants for  
412 haustorium development (Yang et al., 2014) and the key role of chemocyanin as an attractant  
413 for directing pollen tube growth (Kim et al., 2003). The chemocyanin transcript was present in a  
414 previously identified list of *S. hermonthica* “core parasitism” genes with highest expression in  
415 stages 3 and/or 4 of haustorial development (Yang *et al.* 2014; Fig 3B). It was also highly  
416 expressed in cells at the host-parasite interface in a study that used laser capture  
417 microdissection to characterize gene expression in the *S. hermonthica*-sorghum interaction  
418 (Honaas et al., 2013).

419         Alignment of our DNA sequences to the chemocyanin transcript reference revealed host-  
420 associated structural variation (Fig. 3A). PCR-based confirmation indicated 500 bp or more of



421 genome sequence directly upstream of the 5' end of the transcript was completely missing from  
422 parasites on maize, suggesting potential impact on variation in gene expression levels. The  
423 fragmented nature of the draft genome assembly precluded our ability to design PCR primers  
424 completely spanning the deletion, but PCR banding patterns showed a characteristic absence of  
425 the region in individuals having the allele more common on finger millet (Fig. S4), and a diversity  
426 of deletion alleles at this site (Fig. S5). Using just sequences for individuals parasitizing finger  
427 millet, we reconstructed a 934 bp contig, from reads that mapped to the transcript reference and  
428 their unmapped pairs. Alignments to this 'finger millet' allele confirmed its presence in 9/12  
429 individuals from Kisii parasitizing finger millet (AF = 0.75) and 0/12 parasites on maize (Table  
430 S3). Among all individuals sequenced in our study, the allele is present at lowest frequency in  
431 maize parasites (AF = 0.14;  $n = 35$ ) and intermediate frequency for parasites on sorghum (AF =  
432 0.22;  $n = 18$ ); and sugarcane (AF = 0.33;  $n = 3$ ).

433

434 **Validation of k-mer-based approaches**—To further investigate signatures of selection  
435 in the context of genome-wide patterns, we assembled a draft genome for *S. hermonthica* from  
436 South Uganda. The total length of the assembled genome after filtering was 1,431 Mbp over  
437 12,155,247 contigs, with a maximum contig length of 37.5 kb. The assembly was highly  
438 fragmented with the largest 1.69 million contigs accounting for 50% of the assembly, and the  
439 length of these contigs  $\geq 110$  bp (N/L50 = 1690935/110). Nevertheless, sequences of interest  
440 were present on contigs long enough to allow for further interrogation. Specifically, the  
441 assembled chemocyanin transcript for the finger millet allele had 97.8% identity over 918 bp to a  
442 single contig of 1,055 bp (NODE\_132909\_length\_1055\_cov\_32.632), and no other close hits.  
443 After removing contigs shorter than 1 kb, 307026 scaffolds with a total length of 479 Mbp  
444 remained. A Tajima's D value of -1.7 in the Kisii population indicated a significant excess of low-  
445 frequency polymorphism (empirical  $P$ -value = 0.009) for the chemocyanin contig in the *de novo*

446 assembly compared to the genome-wide value of  $0.11 \pm 0.013$  (mean  $\pm$  std. error for non-  
447 overlapping 1-kb windows; linear mixed effects model).

448

## 449 **DISCUSSION**

450 Agricultural weeds are increasingly recognized as important model systems for  
451 addressing key questions in evolution and ecology (Vigueira et al., 2013; Baucom, 2019). In  
452 particular, compared to many other systems, parasitic weeds offer particular advantages for the  
453 study of coevolution including well-developed genomic and germplasm resources for their hosts,  
454 high quality distributional data, and a rich literature describing variation in species interactions  
455 over many decades (Bellis et al., 2020, 2021). Yet, despite recent advances in genome  
456 sequencing for parasitic plants, evolutionary analyses particularly for species with large,  
457 complex genomes (e.g. >1 Gb) remain a challenge (Lyko and Wicke, 2021). Consequently,  
458 previous population-level diversity studies for *S. hermonthica*, one of the most damaging  
459 parasitic plants in agriculture, have used reduced representation approaches (Unachukwu et al.,  
460 2017; Lopez et al., 2019). However, reduced representation approaches such as RAD-seq may  
461 miss signatures of selection that are highly localized in the genome (Lowry et al., 2017; Lou et  
462 al., 2021), and transcriptomes fail to provide information regarding non-coding regions of the  
463 genome, which also generate phenotypic diversity. As the cost of sequencing continues to  
464 decrease, whole genome resequencing coupled with alignment-free bioinformatic approaches  
465 can provide a promising alternate approach for surveying population genomic diversity (Voichek  
466 and Weigel, 2020). Here, we report some of the first publicly available WGS data for field-  
467 sampled individuals of the parasitic weed *Striga hermonthica*. Our analyses underscore high  
468 within-population genomic variation and implicate host-specific selection on genes involved  
469 during parasite attachment and haustorial development.

470 Perhaps surprisingly, we find little genomic or phenotypic evidence for host-specific  
471 selection on strigolactone perception variation in the studied populations. Specifically, one may

472 expect selection on perception loci to be relatively strong, particularly since *S. hermonthica* is an  
473 obligate parasite and so the costs of germination in the absence of a suitable host are high. The  
474 genomes of *Striga* spp. include a diverse repertoire of strigolactone receptors, each with  
475 variable affinity for different SLs (Tsuchiya et al., 2015; Yoshida et al., 2019), providing many  
476 potential targets for selection on SL response variation. One possibility is that these receptors  
477 are now subject to purifying selection in western Kenya, rather than diversifying selection  
478 expected if SL perception variation is strongly linked to fitness variation across different hosts.  
479 Environmental niche models from our previous study (Bellis et al., 2021) predict highest habitat  
480 suitability for maize parasitism across sampling locations in our study (mean habitat suitability:  
481 0.92) but lower suitability for sorghum and pearl millet (0.46 and 0.03, respectively). Strong  
482 selective pressure for maize parasitism may contribute to the generalist germination response  
483 observed in western Kenya. Another possibility is that the particular host genotypes studied  
484 here may overlap in SL exudation profile enough that selection on parasite germination rate  
485 variation is not strong in these natural field populations. For example, while zealactones appear  
486 to be uniquely produced by maize (Charnikhova et al., 2017), some varieties also naturally  
487 produce sorgomol and 5-deoxystrigol in high quantities (Yoneyama et al., 2015), strigolactones  
488 common in sorghum root exudate that promote strong germination response in *S. hermonthica*.

489 A third explanation is that SL perception is important for reciprocal selection and  
490 coevolution only in some populations across the range of *S. hermonthica*. This explanation is  
491 consistent with the idea of coevolutionary hotspots, where there is reciprocal selection among  
492 coevolving species (Thompson, 2005), but with the genetic targets of selection involving  
493 different stages of the infection process in different locations. In western Kenya, for example,  
494 coevolutionary hotspots may be 'hotter' for genes involved in parasitic interactions post-  
495 germination than for SL perception. Kenyan *S. hermonthica* populations exhibit a more  
496 generalist germination response compared to populations from West Africa, which show  
497 pronounced differences in response to orobanchol vs. 5-deoxystrigol from host root exudates or

498 to strigolactone standards (Parker and Reid, 1979; Haussmann et al., 2004; Bellis et al., 2020).  
499 This idea also corresponds with previous findings that East African *S. hermonthica* may have  
500 greater average infestation success across diverse sorghum genotypes than West African  
501 populations (Bozkurt et al., 2015). Functional  $G_H \times G_P$  in strigolactone response variation may  
502 segregate among populations in a different part of the parasite range than studied here, for  
503 example among West African populations, or at a broader spatial scale, for example in West vs.  
504 East African parasite populations (Haussmann et al., 2004; Bellis et al., 2020).

505 In contrast to general expectations (Nuismer and Dybdahl, 2016), our genomic analyses  
506 revealed the strongest evidence for host-specific selection on genes involved in the later stages  
507 of parasite development (Fig. 3, Fig. S3). The best evidence for host-specific selection on  
508 haustorium loci came from our analyses of a transcript annotated as a chemocyanin precursor  
509 (Fig. 3). In addition to strong differentiation between finger millet and maize hosts, the 1-kb  
510 region including the chemocyanin exhibited an excess of rare polymorphism and multiple alleles  
511 (Fig. S4-5), consistent with expectations for recurrent soft sweeps from standing genetic  
512 variation (Pennings and Hermisson, 2006). Notably, even the strongest signals of host-specific  
513 selection detected in our study did not reveal any loci exhibiting complete differentiation  
514 between parasites on different hosts, indicating that there may be relatively few genetic barriers  
515 to parasitism of different cereal host species in our region. The ‘finger millet’ chemocyanin allele,  
516 for example, was also present at low frequency in the genomes of parasites on other host  
517 species. This suggests a neutral impact of the allele on parasitism of other hosts, given that all  
518 sequenced parasite individuals were already at an advanced life stage. The importance of  
519 conditional neutrality for local adaptation in other systems (Lowry et al., 2019) further highlights  
520 the complexity of selective pressures shaping local adaptation of parasitic plants to dynamic  
521 host communities.

522

523 **CONCLUSIONS**

524 While our results emphasize the challenges of *Striga* management due to high genomic  
525 diversity and adaptive potential, they also highlight the promise of low coverage WGS  
526 approaches for functional genomics of non-model species. The outlier signal for two of the three  
527 candidate loci we describe in detail here resulted from structural variation that would not have  
528 been uncovered in an alignment-based analysis or using a RAD-Seq approach that may only  
529 survey a small portion of the genome or be prone to allele drop-out. Reference-free approaches  
530 continue to gain ground for studies of genomic and phenotypic variation in plants, with well-  
531 documented advantages (VanWallendael and Alvarez, 2020; Voichek and Weigel, 2020). Our  
532 study indicates that the utility of large WGS datasets may not be out of reach even for species  
533 such as *Striga hermonthica* characterized by large, complex genomes. As the need to mitigate  
534 biotic constraints on global food security becomes increasingly critical, reference-free analyses  
535 coupled with WGS data may serve as a promising strategy for rapid characterization of alleles  
536 involved in parasite adaptation across diverse environments.

537

## 538 **ACKNOWLEDGMENTS**

539 This study is based on work supported by a National Science Foundation Postdoctoral  
540 Research Fellowship in Biology to E.S.B. under Grant 1711950, the Arkansas Biosciences  
541 Institute (the major research component of the Arkansas Tobacco Settlement Proceeds Act of  
542 2000), and the *Emmy Noether*-program of the German Science Foundation (WI4507/3-1 to  
543 S.W.). A.K. and X.H. were supported by NSF EPSCoR Award 1946391. J.R.L. was supported  
544 by NIH 1 R35 GM138300-01.

545

## 546 **AUTHOR CONTRIBUTIONS**

547 C.S.v.M., S.W., C.O.O., E.K., T.X., and E.S.B collected and processed samples and performed  
548 laboratory experiments. C.S.v.M., S.W., A.K., and E.S.B. carried out analyses. X.H., S.W.,

549 S.M.R., C.W.D., J.R.L., and E.S.B. contributed to experimental design and interpretation. E.S.B.  
550 and J.R.L. drafted the manuscript, with input and critical revision from all authors. All authors  
551 approved the final version of the manuscript.

552

### 553 **DATA AND CODE AVAILABILITY**

554 Raw reads from whole genome sequencing of the 68 *S. hermonthica* individuals from the 2018  
555 collection and the Ugandan reference have been deposited in the National Center for  
556 Biotechnology Information (NCBI) Sequence Read Archive (SRA) database,  
557 <https://www.ncbi.nlm.nih.gov/sra> (BioProject accession no. PRJNA801489). The reference  
558 assembly of the Ugandan specimen is available for download and BLAST searches on *WARPP*  
559 (<https://warpp.app>; (Kösters et al., 2021). Images associated with the different collection sites  
560 are available from iNaturalist. Germination rate data and code to reproduce the analyses are  
561 available at <https://github.com/em-bellis/StrigaWGS>.

### 562 **SUPPLEMENTARY INFORMATION**

563 Additional supporting information may be found online in the Supporting Information Section at  
564 the end of the article.

565 Appendix S1: Supplementary Figures and Tables.

566

### 567 **LITERATURE CITED**

568 Akiyama, K., K. Matsuzaki, and H. Hayashi. 2005. Plant sesquiterpenes induce hyphal  
569 branching in arbuscular mycorrhizal fungi. *Nature* 435: 824–827.

570 Awad, A. A., D. Sato, D. Kusumoto, H. Kamioka, Y. Takeuchi, and K. Yoneyama. 2006.

571 Characterization of Strigolactones, Germination Stimulants for the Root Parasitic Plants

- 572            *Striga* and *Orobanchae*, Produced by Maize, Millet and Sorghum. *Plant Growth*  
573            *Regulation* 48: 221.
- 574    Bankevich, A., S. Nurk, D. Antipov, A. A. Gurevich, M. Dvorkin, A. S. Kulikov, V. M. Lesin, et al.  
575            2012. SPAdes: a new genome assembly algorithm and its applications to single-cell  
576            sequencing. *Journal of computational biology* 19: 455–477.
- 577    Bates, D., M. Mächler, B. Bolker, and S. Walker. 2015. Fitting Linear Mixed-Effects Models  
578            Using lme4. *Journal of Statistical Software* 67: 1–48.
- 579    Baucom, R. S. 2019. Evolutionary and ecological insights from herbicide-resistant weeds: what  
580            have we learned about plant adaptation, and what is left to uncover? *New Phytologist*  
581            223: 68–82.
- 582    Bebawi, F. F., R. E. Eplee, C. E. Harris, and R. S. Norris. 1984. Longevity of witchweed (*Striga*  
583            *asiatica*) seed. *Weed Science* 32: 494–497.
- 584    Bellis, E., and E. Kelly. 2019. *Striga hermonthica* germination assay. *protocols.io*.
- 585    Bellis, E. S., E. A. Kelly, C. M. Lorts, H. Gao, V. L. DeLeo, G. Rouhan, A. Budden, et al. 2020.  
586            Genomics of sorghum local adaptation to a parasitic plant. *Proceedings of the National*  
587            *Academy of Sciences* 117: 4243.
- 588    Bellis, E. S., C. M. McLaughlin, C. W. dePamphilis, and J. R. Lasky. 2021. The geography of  
589            parasite local adaptation to host communities. *Ecography*.
- 590    Bolger, A. M., M. Lohse, and B. Usadel. 2014. Trimmomatic: a flexible trimmer for Illumina  
591            sequence data. *Bioinformatics* 30: 2114–2120.

- 592 Bolnick, D. I., L. H. Yang, J. A. Fordyce, J. M. Davis, and R. Svanbäck. 2002. Measuring  
593 Individual-Level Resource Specialization. *Ecology* 83: 2936–2941.
- 594 Bozkurt, M. L., P. Muth, H. K. Parzies, and B. I. G. Haussmann. 2015. Genetic diversity of East  
595 and West African *Striga hermonthica* populations and virulence effects on a contrasting  
596 set of sorghum cultivars. *Weed Research* 55: 71–81.
- 597 Bushnell, B. BbMap. Website [sourceforge.net/projects/bbmap/](https://sourceforge.net/projects/bbmap/).
- 598 Cardoso, C., T. Charnikhova, M. Jamil, P.-M. Delaux, F. Verstappen, M. Amini, D.  
599 Laouressergues, et al. 2014. Differential Activity of *Striga hermonthica* Seed Germination  
600 Stimulants and *Gigaspora rosea* Hyphal Branching Factors in Rice and Their  
601 Contribution to Underground Communication. *PLOS ONE* 9: 1–11.
- 602 Castellano, D., L. H. Uricchio, K. Munch, and D. Enard. 2019. Viruses rule over adaptation in  
603 conserved human proteins. *bioRxiv*: 555060.
- 604 Charnikhova, T. V., K. Gaus, A. Lumbroso, M. Sanders, J.-P. Vincken, A. D. Mesmaeker, C. P.  
605 Ruyter-Spira, et al. 2017. Zealactones. Novel natural strigolactones from maize.  
606 *Phytochemistry* 137: 123–131.
- 607 Conn, C. E., R. Bythell-Douglas, D. Neumann, S. Yoshida, B. Whittington, J. H. Westwood, K.  
608 Shirasu, et al. 2015. Convergent evolution of strigolactone perception enabled host  
609 detection in parasitic plants. *Science* 349: 540–543.
- 610 Cui, S., S. Wada, Y. Tobimatsu, Y. Takeda, S. B. Saucet, T. Takano, T. Umezawa, et al. 2018.  
611 Host lignin composition affects haustorium induction in the parasitic plants  
612 *Phtheirospermum japonicum* and *Striga hermonthica*. *New Phytologist* 218: 710–723.



- 613 Dayou, O., W. Kibet, P. Ojola, P. I. Gangashetty, S. Wicke, and S. Runo. 2021. Two-tier  
614 witchweed (*Striga hermonthica*) resistance in wild pearl millet (*Pennisetum glaucum*)  
615 29Aw. *Weed Science* 69: 300–306.
- 616 Ebert, D., and P. D. Fields. 2020. Host–parasite co-evolution and its genomic signature. *Nature*  
617 *Reviews Genetics* 21: 754–768.
- 618 Ejeta, G. 2007. The *Striga* scourge in Africa: a growing pandemic. Integrating new technologies  
619 for *Striga* control: towards ending the witch-hunt, 3–16. World Scientific.
- 620 Estep, M. C., B. S. Gowda, K. Huang, M. P. Timko, and J. L. Bennetzen. 2012. Genomic  
621 characterization for parasitic weeds of the genus *Striga* by sample sequence analysis.  
622 *The Plant Genome* 5.
- 623 Fumagalli, M., M. Sironi, U. Pozzoli, A. Ferrer-Admettla, L. Pattini, and R. Nielsen. 2011.  
624 Signatures of environmental genetic adaptation pinpoint pathogens as the main selective  
625 pressure through human evolution. *PLoS genetics* 7: e1002355.
- 626 Gbèhounou, G., A. H. Pieterse, and J. A. Verkleij. 2003. Longevity of *Striga* seeds reconsidered:  
627 results of a field study on purple witchweed (*Striga hermonthica*) in Benin. *Weed*  
628 *Science* 51: 940–946.
- 629 Gethi, J. G., M. E. Smith, S. E. Mitchell, and S. Kresovich. 2005. Genetic diversity of *Striga*  
630 *hermonthica* and *Striga asiatica* populations in Kenya. *Weed Research* 45: 64–73.
- 631 Gobena, D., M. Shimels, P. J. Rich, C. Ruyter-Spira, H. Bouwmeester, S. Kanuganti, T.  
632 Mengiste, and G. Ejeta. 2017. Mutation in sorghum LOW GERMINATION STIMULANT 1  
633 alters strigolactones and causes *Striga* resistance. *Proceedings of the National*  
634 *Academy of Sciences* 114: 4471–4476.

- 635 Gurevich, A., V. Saveliev, N. Vyahhi, and G. Tesler. 2013. QAST: quality assessment tool for  
636 genome assemblies. *Bioinformatics* 29: 1072–1075.
- 637 Hall, M. D., G. Bento, and D. Ebert. 2017. The evolutionary consequences of stepwise infection  
638 processes. *Trends in Ecology & Evolution* 32: 612–623.
- 639 Hall, M. D., J. Routtu, and D. Ebert. 2019. Dissecting the genetic architecture of a stepwise  
640 infection process. *Molecular ecology* 28: 3942–3957.
- 641 Haussmann, B., D. Hess, G. Omany, R. Folkertsma, B. Reddy, M. Kayentao, H. Welz, and H.  
642 Geiger. 2004. Genomic regions influencing resistance to the parasitic weed *Striga*  
643 *hermonthica* in two recombinant inbred populations of sorghum. *Theoretical and Applied*  
644 *Genetics* 109: 1005–1016.
- 645 Honaas, L. A., E. K. Wafula, Z. Yang, J. P. Der, N. J. Wickett, N. S. Altman, C. G. Taylor, et al.  
646 2013. Functional genomics of a generalist parasitic plant: Laser microdissection of host-  
647 parasite interface reveals host-specific patterns of parasite gene expression. *BMC Plant*  
648 *Biology* 13: 9.
- 649 Ichihashi, Y., M. Kusano, M. Kobayashi, K. Suetsugu, S. Yoshida, T. Wakatake, K. Kumaishi, et  
650 al. 2017. Transcriptomic and Metabolomic Reprogramming from Roots to Haustoria in  
651 the Parasitic Plant, *Thesium chinense*. *Plant and Cell Physiology* 59: 729–738.
- 652 Jackman, S. D., B. P. Vandervalk, H. Mohamadi, J. Chu, S. Yeo, S. A. Hammond, G. Jahesh, et  
653 al. 2017. ABySS 2.0: resource-efficient assembly of large genomes using a Bloom filter.  
654 *Genome research* 27: 768–777.

- 655 Kavuluko, J., M. Kibe, I. Sugut, W. Kibet, J. Masanga, S. Mutinda, M. Wamalwa, et al. 2020.  
656 GWAS provides biological insights into mechanisms of the parasitic plant (*Striga*)  
657 resistance in Sorghum.
- 658 Kim, G., M. L. LeBlanc, E. K. Wafula, C. W. DePamphilis, and J. H. Westwood. 2014. Genomic-  
659 scale exchange of mRNA between a parasitic plant and its hosts. *Science* 345: 808–  
660 811.
- 661 Kim, S., J.-C. Mollet, J. Dong, K. Zhang, S.-Y. Park, and E. M. Lord. 2003. Chemocyanin, a  
662 small basic protein from the lily stigma, induces pollen tube chemotropism. *Proceedings*  
663 *of the National Academy of Sciences* 100: 16125–16130.
- 664 Kim, S. Y., K. E. Lohmueller, A. Albrechtsen, Y. Li, T. Korneliusen, G. Tian, N. Grarup, et al.  
665 2011. Estimation of allele frequency and association mapping using next-generation  
666 sequencing data. *BMC Bioinformatics* 12: 231.
- 667 Korneliusen, T. S., A. Albrechtsen, and R. Nielsen. 2014. ANGSD: Analysis of Next Generation  
668 Sequencing Data. *BMC Bioinformatics* 15: 356.
- 669 Kösters, L. M., S. Wiechers, P. Lyko, K. F. Müller, and S. Wicke. 2021. WARPP—web  
670 application for the research of parasitic plants. *Plant Physiology* 185: 1374–1380.
- 671 Li, H. 2013. Aligning sequence reads, clone sequences and assembly contigs with BWA-MEM.
- 672 Li, H., B. Handsaker, A. Wysoker, T. Fennell, J. Ruan, N. Homer, G. Marth, et al. 2009. The  
673 Sequence Alignment/Map format and SAMtools. *Bioinformatics* 25: 2078–2079.
- 674 Li, J., and M. P. Timko. 2009. Gene-for-gene resistance in *Striga*-cowpea associations. *Science*  
675 325: 1094–1094.

- 676 Liu, N., G. Shen, Y. Xu, H. Liu, J. Zhang, S. Li, J. Li, et al. 2020. Extensive inter-plant protein  
677 transfer between *Cuscuta* parasites and their host plants. *Molecular plant* 13: 573–585.
- 678 Lopez, L., E. S. Bellis, E. Wafula, S. J. Hearne, L. Honaas, P. E. Ralph, M. P. Timko, et al.  
679 2019. Transcriptomics of host-specific interactions in natural populations of the parasitic  
680 plant purple witchweed (*Striga hermonthica*). *Weed Science* 67: 397–411.
- 681 Lou, R., A. Jacobs, A. Wilder, and N. O. Therkildsen. 2021. A beginner’s guide to low-coverage  
682 whole genome sequencing for population genomics. *Authorea*.
- 683 Louthan, A. M., and K. M. Kay. 2011. Comparing the adaptive landscape across trait types:  
684 larger QTL effect size in traits under biotic selection. *BMC evolutionary biology* 11: 1–12.
- 685 Lowry, D. B., S. Hoban, J. L. Kelley, K. E. Lotterhos, L. K. Reed, M. F. Antolin, and A. Storer.  
686 2017. Breaking RAD: an evaluation of the utility of restriction site-associated DNA  
687 sequencing for genome scans of adaptation. *Molecular Ecology Resources* 17: 142–  
688 152.
- 689 Lowry, D. B., J. T. Lovell, L. Zhang, J. Bonnette, P. A. Fay, R. B. Mitchell, J. Lloyd-Reilley, et al.  
690 2019. QTL × environment interactions underlie adaptive divergence in switchgrass  
691 across a large latitudinal gradient. *Proceedings of the National Academy of Sciences*  
692 116: 12933.
- 693 Lyko, P., and S. Wicke. 2021. Genomic reconfiguration in parasitic plants involves considerable  
694 gene losses alongside global genome size inflation and gene births. *Plant Physiology*  
695 186: 1412–1423.

- 696 Mallu, T. S., S. Mutinda, S. M. Githiri, D. Achieng Odeny, and S. Runo. 2021. New pre-  
697 attachment *Striga* resistant sorghum adapted to African agro-ecologies. *Pest*  
698 *Management Science* 77: 2894–2902.
- 699 Masumoto, N., Y. Suzuki, S. Cui, M. Wakazaki, M. Sato, K. Kumaishi, A. Shibata, et al. 2021.  
700 Three-dimensional reconstructions of haustoria in two parasitic plant species in the  
701 Orobanchaceae. *Plant Physiology* 185: 1429–1442.
- 702 Mbuvi, D. A., C. W. Masiga, E. K. Kuria, J. Masanga, M. Wamalwa, A. Mohamed, D. Odeny, et  
703 al. 2017. Novel sources of witchweed (*Striga*) resistance from wild sorghum accessions.  
704 *Frontiers in plant science* 8: 116.
- 705 Mutinda, S. M., J. Masanga, J. M. Mutuku, S. Runo, and A. Alakonya. 2018. KSTP 94, an open-  
706 pollinated maize variety has postattachment resistance to purple witchweed (*Striga*  
707 *hermonthica*). *Weed science* 66: 525–529.
- 708 Nei, M. 1973. Analysis of Gene Diversity in Subdivided Populations. *Proceedings of the National*  
709 *Academy of Sciences* 70: 3321–3323.
- 710 Nei, M., and R. K. Chesser. 1983. Estimation of fixation indices and gene diversities. *Annals of*  
711 *Human Genetics* 47: 253–259.
- 712 Nelson, D. C. 2021. The mechanism of host-induced germination in root parasitic plants. *Plant*  
713 *Physiology* 185: 1353–1373.
- 714 Nuismer, S. L., and M. F. Dybdahl. 2016. Quantifying the coevolutionary potential of multistep  
715 immune defenses. *Evolution* 70: 282–295.

- 716 Ondov, B. D., T. J. Treangen, P. Melsted, A. B. Mallonee, N. H. Bergman, S. Koren, and A. M.  
717 Phillippy. 2016. Mash: fast genome and metagenome distance estimation using  
718 MinHash. *Genome Biology* 17: 132.
- 719 Padgham, M., and M. D. Sumner. 2021. geodist: Fast, Dependency-Free Geodesic Distance  
720 Calculations.
- 721 Paradis, E., and K. Schliep. 2019. ape 5.0: an environment for modern phylogenetics and  
722 evolutionary analyses in R. *Bioinformatics* 35: 526–528.
- 723 Parker, C., and D. C. Reid. 1979. Host specificity in *Striga* species: Some preliminary  
724 observations. Proceeding of the Second International Symposium on Parasitic Weeds,  
725 Raleigh, NC, 1979,.
- 726 Pennings, P. S., and J. Hermisson. 2006. Soft sweeps III: the signature of positive selection  
727 from recurrent mutation. *PLoS genetics* 2: e186.
- 728 Poland, J. A., P. J. Balint-Kurti, R. J. Wisser, R. C. Pratt, and R. J. Nelson. 2009. Shades of  
729 gray: the world of quantitative disease resistance. *Trends in plant science* 14: 21–29.
- 730 R Core Team. 2020. R: A language and environment for statistical computing. R Foundation for  
731 Statistical Computing, Vienna, Austria.
- 732 Rahman, A., I. Hallgrímsson, M. Eisen, and L. Pachter. 2018. Association mapping from  
733 sequencing reads using *k*-mers J. Flint [ed.],. *eLife* 7: e32920.
- 734 Ravensdale, M., A. Nemri, P. H. Thrall, J. G. Ellis, and P. N. Dodds. 2011. Co-evolutionary  
735 interactions between host resistance and pathogen effector genes in flax rust disease.  
736 *Molecular plant pathology* 12: 93–102.

- 737 Savary, S., L. Willocquet, S. J. Pethybridge, P. Esker, N. McRoberts, and A. Nelson. 2019. The  
738 global burden of pathogens and pests on major food crops. *Nature ecology & evolution*  
739 3: 430–439.
- 740 Shahid, S., G. Kim, N. R. Johnson, E. Wafula, F. Wang, C. Coruh, V. Bernal-Galeano, et al.  
741 2018. MicroRNAs from the parasitic plant *Cuscuta campestris* target host messenger  
742 RNAs. *Nature* 553: 82–85.
- 743 Shen, G., N. Liu, J. Zhang, Y. Xu, I. T. Baldwin, and J. Wu. 2020. *Cuscuta australis* (dodder)  
744 parasite eavesdrops on the host plants' FT signals to flower. *Proceedings of the National*  
745 *Academy of Sciences* 117: 23125–23130.
- 746 Spallek, T., M. Mutuku, and K. Shirasu. 2013. The genus *Striga*: a witch profile. *Molecular plant*  
747 *pathology* 14: 861–869.
- 748 Therkildsen, N. O., and S. R. Palumbi. 2017. Practical low-coverage genome-wide sequencing  
749 of hundreds of individually barcoded samples for population and evolutionary genomics  
750 in nonmodel species. *Molecular Ecology Resources* 17: 194–208.
- 751 Thompson, J. N. 2005. The geographic mosaic of coevolution. University of Chicago Press.
- 752 Thrall, P. H., A.-L. Laine, M. Ravensdale, A. Nemri, P. N. Dodds, L. G. Barrett, and J. J. Burdon.  
753 2012. Rapid genetic change underpins antagonistic coevolution in a natural host-  
754 pathogen metapopulation. *Ecology letters* 15: 425–435.
- 755 Timko, M. P., K. Huang, and K. E. Lis. 2012. Host resistance and parasite virulence in *Striga*-  
756 host plant interactions: A shifting balance of power. *Weed Science* 60: 307–315.

- 757 Toh, S., D. Holbrook-Smith, P. J. Stogios, O. Onopriyenko, S. Lumba, Y. Tsuchiya, A.  
758 Savchenko, and P. McCourt. 2015. Structure-function analysis identifies highly sensitive  
759 strigolactone receptors in *Striga*. *Science* 350: 203–207.
- 760 Tsuchiya, Y., M. Yoshimura, Y. Sato, K. Kuwata, S. Toh, D. Holbrook-Smith, H. Zhang, et al.  
761 2015. Probing strigolactone receptors in *Striga hermonthica* with fluorescence. *Science*  
762 349: 864–868.
- 763 Unachukwu, N. N., A. Menkir, I. Y. Rabbi, M. Oluoch, S. Muranaka, A. Elzein, G. Odhiambo, et  
764 al. 2017. Genetic diversity and population structure of *Striga hermonthica* populations  
765 from Kenya and Nigeria. *Weed Research* 57: 293–302.
- 766 VanWalleendael, A., and M. Alvarez. 2020. Alignment-free methods for polyploid genomes: quick  
767 and reliable genetic distance estimation. *bioRxiv*.
- 768 Vigueira, C. C., K. M. Olsen, and A. L. Caicedo. 2013. The red queen in the corn: agricultural  
769 weeds as models of rapid adaptive evolution. *Heredity* 110: 303–311.
- 770 Voickek, Y., and D. Weigel. 2020. Identifying genetic variants underlying phenotypic variation in  
771 plants without complete genomes. *Nature Genetics* 52: 534–540.
- 772 Westwood, J. H., C. W. dePamphilis, M. Das, M. Fernández-Aparicio, L. A. Honaas, M. P.  
773 Timko, E. K. Wafula, et al. 2012. The Parasitic Plant Genome Project: New Tools for  
774 Understanding the Biology of Orobanche and Striga. *Weed Science* 60: 295–306.
- 775 Wicke, S., K. F. Müller, C. W. dePamphilis, D. Quandt, S. Bellot, and G. M. Schneeweiss. 2016.  
776 Mechanistic model of evolutionary rate variation en route to a nonphotosynthetic lifestyle  
777 in plants. *Proceedings of the National Academy of Sciences* 113: 9045–9050.



- 778 Wicke, S., K. F. Müller, C. W. de Pamphilis, D. Quandt, N. J. Wickett, Y. Zhang, S. S. Renner,  
779 and G. M. Schneeweiss. 2013. Mechanisms of functional and physical genome  
780 reduction in photosynthetic and nonphotosynthetic parasitic plants of the broomrape  
781 family. *The Plant Cell* 25: 3711–3725.
- 782 Wilfert, L., and P. Schmid-Hempel. 2008. The genetic architecture of susceptibility to parasites.  
783 *BMC Evolutionary Biology* 8: 1–8.
- 784 Wood, D. E., J. Lu, and B. Langmead. 2019. Improved metagenomic analysis with Kraken 2.  
785 *Genome biology* 20: 1–13.
- 786 Yang, Z., E. K. Wafula, L. A. Honaas, H. Zhang, M. Das, M. Fernandez-Aparicio, K. Huang, et  
787 al. 2014. Comparative Transcriptome Analyses Reveal Core Parasitism Genes and  
788 Suggest Gene Duplication and Repurposing as Sources of Structural Novelty. *Molecular*  
789 *Biology and Evolution* 32: 767–790.
- 790 Yang, Z., E. K. Wafula, G. Kim, S. Shahid, J. R. McNeal, P. E. Ralph, P. R. Timilsena, et al.  
791 2019. Convergent horizontal gene transfer and cross-talk of mobile nucleic acids in  
792 parasitic plants. *Nature Plants* 5: 991–1001.
- 793 Yoneyama, K., R. Arakawa, K. Ishimoto, H. I. Kim, T. Kisugi, X. Xie, T. Nomura, et al. 2015.  
794 Difference in *Striga*-susceptibility is reflected in strigolactone secretion profile, but not in  
795 compatibility and host preference in arbuscular mycorrhizal symbiosis in two maize  
796 cultivars. *New Phytologist* 206: 983–989.
- 797 Yoneyama, K., X. Xie, H. Sekimoto, Y. Takeuchi, S. Ogasawara, K. Akiyama, H. Hayashi, and  
798 K. Yoneyama. 2008. Strigolactones, host recognition signals for root parasitic plants and  
799 arbuscular mycorrhizal fungi, from Fabaceae plants. *New Phytologist* 179: 484–494.

800 Yoshida, S., J. K. Ishida, N. M. Kamal, A. M. Ali, S. Namba, and K. Shirasu. 2010. A full-length  
801 enriched cDNA library and expressed sequence tag analysis of the parasitic weed,  
802 *Striga hermonthica*. *BMC Plant Biology* 10: 1–10.

803 Yoshida, S., S. Kim, E. K. Wafula, J. Tanskanen, Y.-M. Kim, L. Honaas, Z. Yang, et al. 2019.  
804 Genome sequence of *Striga asiatica* provides insight into the evolution of plant  
805 parasitism. *Current Biology* 29: 3041–3052.

806

807

808 **Appendix S1: Supplementary Figures and Tables**

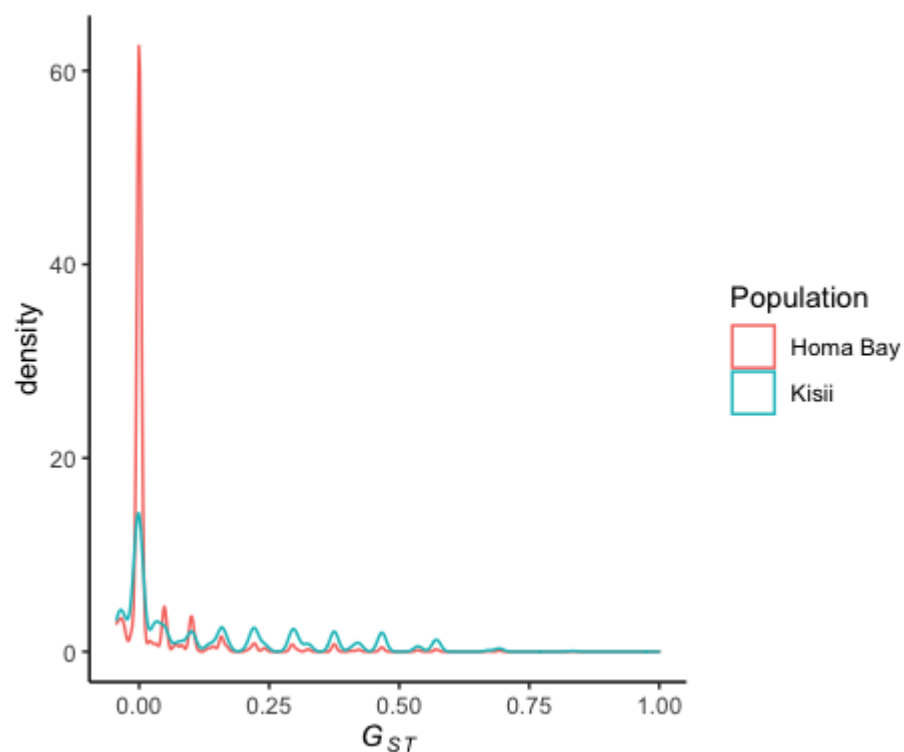

809

810

811 **Figure S1.** Distribution of  $G_{ST}$  values. For Homa Bay,  $G_{ST}$  is based on comparisons for  
812 parasites on adjacent plots of maize vs. sorghum at 2,765,562 31-mers. For Kisii,  $G_{ST}$  is based  
813 on comparisons for parasites on adjacent plots of maize vs. sorghum at 2,123,902 31-mers.

814

815

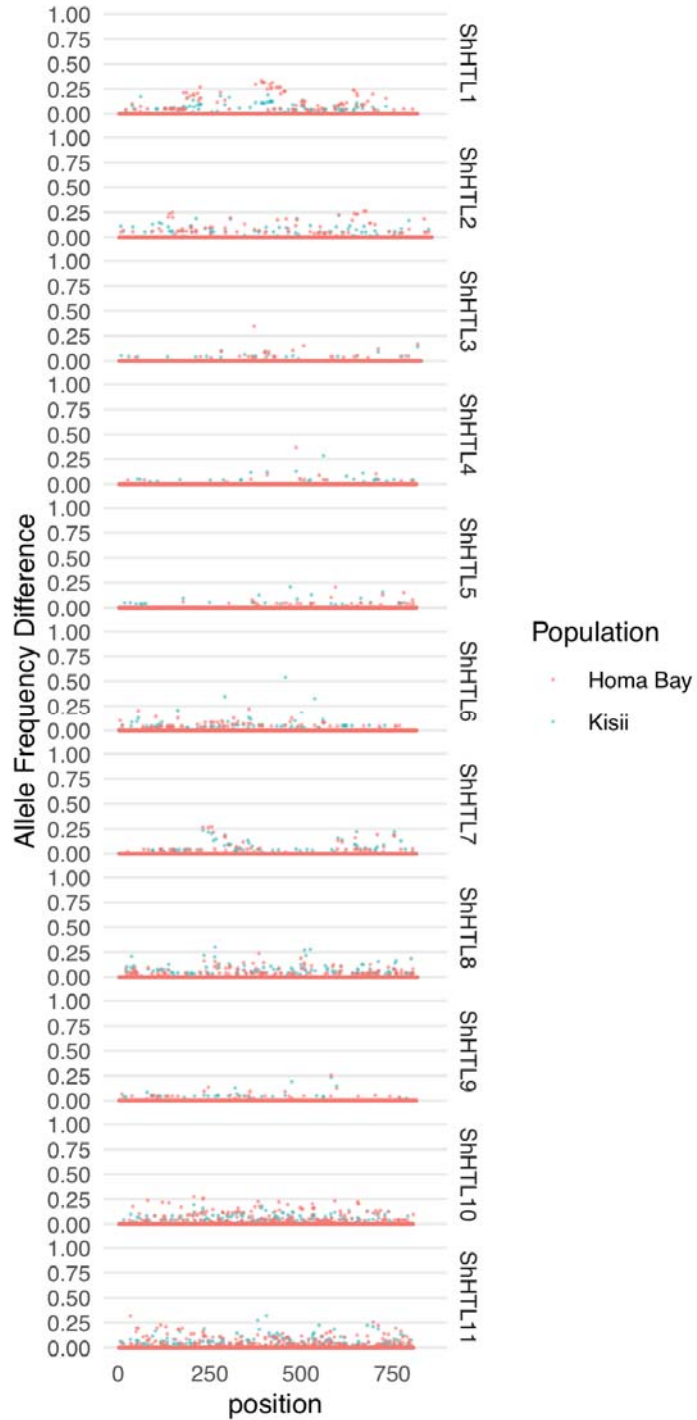

816

817

818 **Figure S2.** Allele frequency differences for 11 *ShHTL* receptors from Tsuchiya et al. (2015).

819 Allele frequencies were estimated from genotype likelihoods based on reads mapped to each

820 reference transcript. Allele frequency was estimated for parasites on each host species

821 separately ( $n = 12$  per unique host and population). The difference in allele frequency estimates  
822 between two hosts within a single population is shown.  
823

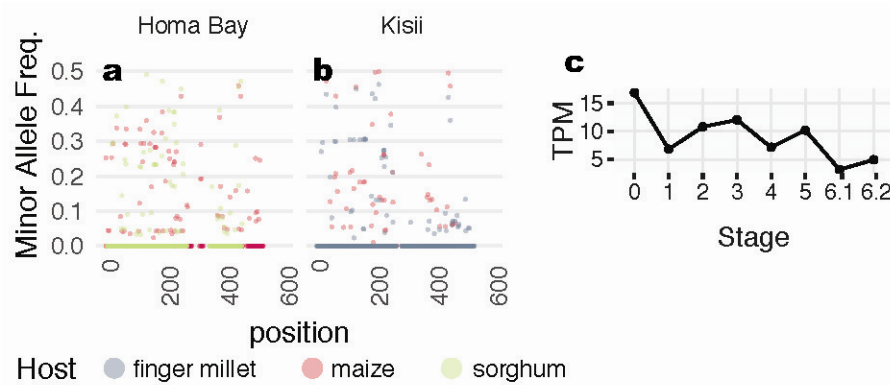

824  
825 **Figure S3.** (a,b) Minor allele frequency differences based on alignments to the *SGT1* transcript  
826 sequence (StHeBC4\_p\_c12587\_g2\_i1), split by population. If the locus is not present in any of  
827 the sequenced individuals for that population due to genetic structural variation, no data point is  
828 shown. Frequencies were estimated based on genotype likelihoods from  $n = 12$  individuals per  
829 unique host and population. (c) Gene expression data in transcripts per million (TPM) from the  
830 PPGPII data across the 6 stages of haustorial development from data published.

831

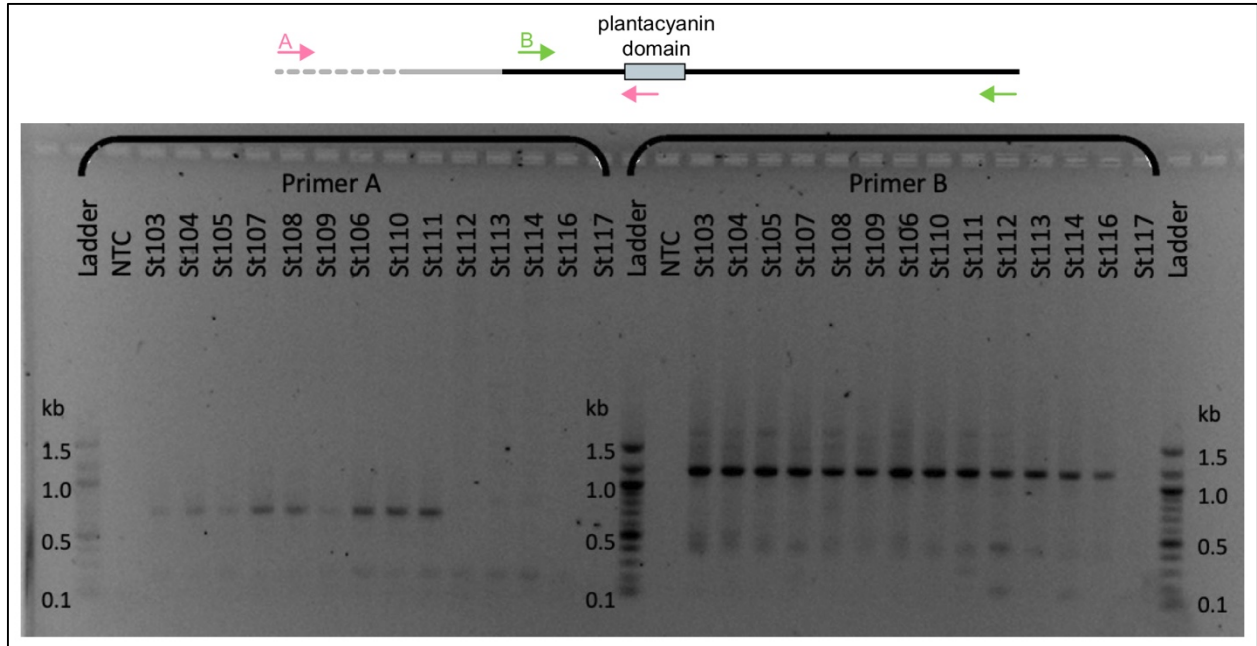

832

833 **Figure S4. PCR banding results to confirm chemocyanin deletion calls.** In the top panel,  
834 binding sites for primer sets A (pink) and B (green) are shown relative to location of the  
835 transcript sequence (solid black line), location of the deletion (grey dashed line), and conserved  
836 plantacyanin domain (light blue rectangle). Primer set A does not yield a 676-bp band for  
837 individuals with the deletion (lanes 11-15) whereas primer set B amplifies a region downstream  
838 of the deletion. NTC: no template control.

839

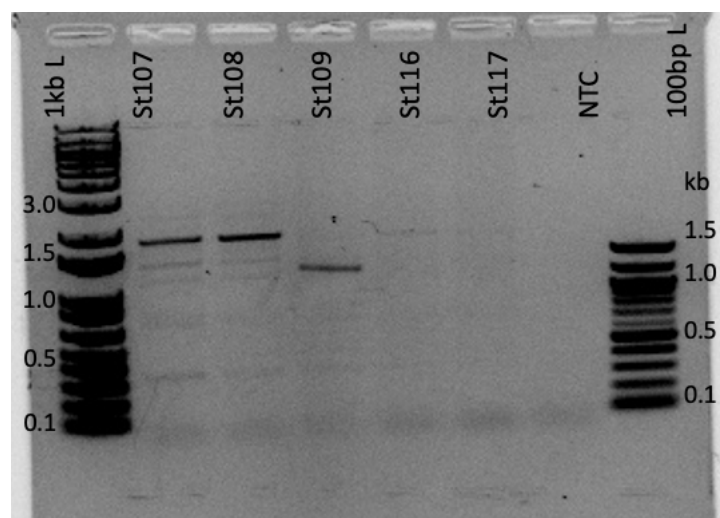

840

841 **Figure S5. PCR banding results suggest multiple deletion variants.** PCR amplification

842 using the outer primers from set A (5'-TCTCGATCCTTTTGGGAATGG-3') and B (5'-

843 TGGGGAAAGAGGTAGTGCAA-3'); see Fig. S4). NTC: no template control. Lane 1: Sh107;

844 Lane 2: Sh108, Lane 3: Sh109; Lane 4: Sh116; Lane 5: Sh117.

845

846

847 **Table S1.** GLMM for analysis of germination rate variation

|                  | <b>Estimate</b> | <b>Std. Error</b> | <b>z-value</b> | <b>P</b> |
|------------------|-----------------|-------------------|----------------|----------|
| Intercept        | 2.29            | 0.97              | 2.37           | 0.017    |
| Site == Kisii    | -2.16           | 0.79              | -2.72          | 0.006    |
| Host == Maize    | -1.13           | 0.79              | -1.43          | 0.153    |
| Host == Sorghum  | -1.90           | 1.12              | -1.70          | 0.089    |
| Treatment == ORO | -0.16           | 0.06              | -2.85          | 0.004    |

848

849

850



851 **Table S2.** Hits to transcripts from the Parasitic Plant Genome Project (PPGP II) or Sh14v2 (from  
852 Yoshida 2019) for contigs assembled from host-associated *k*-mers for *Striga hermontica* Homa  
853 Bay population (maize vs. sorghum hosts). Transcripts with greater than 85% identity over at  
854 least 45 bp are shown.

---

| <b>PPGP II</b>             | <b>Sh14v2</b>    | <b>Description</b>                     |
|----------------------------|------------------|----------------------------------------|
| StHeBC4_p_c26811_g0_i3     | Sh14Contig_5850  | lipid-a-disaccharide synthase-like     |
| None                       | Sh14Contig_37747 | None                                   |
| None                       | Sh14Contig_44696 | None                                   |
| StHeBC4_p_c12903_g35328_i2 | Sh14Contig_229   | retrotransposon gag protein            |
| StHeBC4_p_c12587_g2_i1     | Sh14Contig_28742 | disease-resistance protein SGT1        |
| None                       | Sh14Contig_5301  | None                                   |
| None                       | Sh14Contig_37747 | None                                   |
| None                       | Sh14Contig_60980 | hypothetical protein ASPNIDRAFT_144168 |
| StHeBC4_u_c25350_g11_i1    | Sh14Contig_78939 | None                                   |
| None                       | Sh14Contig_41198 | None                                   |
| None                       | Sh14Contig_32559 | None                                   |
| StHeBC4_u_c12903_g30818_i7 | Sh14Contig_35967 | None                                   |
| None                       | Sh14Contig_47805 | None                                   |
| StHeBC4_p_c9824_g0_i1      | None             | None                                   |
| StHeBC4_p_c12903_g42998_i1 | None             | None                                   |

---

855

856 **Table S3.** Hits to transcripts from the Parasitic Plant Genome Project (PPGPII) or Sh14v2 (from  
 857 Yoshida 2019) for contigs assembled from host-associated *k*-mers for *Striga hermontica* Kisii  
 858 population (maize vs. finger millet hosts). Transcripts with greater than 85% identity over at least  
 859 45 bp are shown.

| PGPPII                      | Sh14v2           | Description                                                 |
|-----------------------------|------------------|-------------------------------------------------------------|
| None                        | Sh14Contig_45649 | None                                                        |
| StHeBC4_u_c12903_g32907_i4  | Sh14Contig_20178 | probable nicotinate-nucleotide pyrophosphorylase            |
| StHeBC4_u_c12903_g22013_i6  | Sh14Contig_24947 | None                                                        |
| StHeBC4_u_c3941_g0_i1       | Sh14Contig_42609 | hypothetical protein VITISV_012016                          |
| None                        | Sh14Contig_70490 | None                                                        |
| StHeBC4_u_c12903_g34431_i1  | Sh14Contig_17925 | upf0326 protein at4g17486-like                              |
| StHeBC4_p_c12903_g35474_i1  | Sh14Contig_4481  | None                                                        |
| StHeBC4_u_c24490_g2_i1      | Sh14Contig_81114 | None                                                        |
| StHeBC4_p_c12903_g14638_i24 | Sh14Contig_23122 | far-red impaired response protein                           |
| StHeBC4_u_c12903_g34431_i2  | Sh14Contig_17925 | upf0326 protein at4g17486-like                              |
| StHeBC4_u_c12903_g19156_i3  | Sh14Contig_3012  | alcohol dehydrogenase homolog                               |
| StHeBC4_p_c26043_g0_i2      | Sh14Contig_13886 | omega-amidase nit2                                          |
| StHeBC4_p_c12903_g10585_i1  | Sh14Contig_34611 | None                                                        |
| None                        | Sh14Contig_20326 | None                                                        |
| StHeBC4_p_c12903_g6756_i1   | Sh14Contig_12790 | None                                                        |
| StHeBC4_u_c12903_g15860_i5  | Sh14Contig_29096 | None                                                        |
| StHeBC4_u_c12903_g7220_i1   | Sh14Contig_60050 | None                                                        |
| None                        | Sh14Contig_3989  | None                                                        |
| StHeBC4_p_c12903_g2276_i2   | Sh14Contig_4881  | rna polymerase ii c-terminal domain phosphatase-like 1-like |
| StHeBC4_u_c12903_g1840_i3   | Sh14Contig_19406 | e3 ubiquitin-protein ligase ring1-like                      |
| None                        | Sh14Contig_71030 | None                                                        |
| StHeBC4_p_c12903_g39698_i9  | Sh14Contig_45458 | gag-protease polyprotein                                    |
| StHeBC4_u_c12903_g32907_i12 | Sh14Contig_81511 | None                                                        |
| StHeBC4_u_c12903_g34427_i1  | Sh14Contig_46360 | None                                                        |
| StHeBC4_p_c12903_g35474_i1  | Sh14Contig_4481  | None                                                        |
| StHeBC4_p_c12903_g11444_i1  | Sh14Contig_40193 | polyprotein                                                 |
| StHeBC4_u_c19051_g0_i1      | Sh14Contig_66323 | None                                                        |
| StHeBC4_p_c12903_g10585_i1  | Sh14Contig_12790 | None                                                        |
| StHeBC4_u_c12903_g1736_i4   | Sh14Contig_28260 | None                                                        |
| None                        | Sh14Contig_31117 | PREDICTED: uncharacterized protein LOC100256114             |
| StHeBC4_u_c12903_g33489_i1  | Sh14Contig_51019 | None                                                        |
| StHeBC4_p_c16693_g0_i2      | Sh14Contig_33691 | hypothetical protein VITISV_018984                          |
| StHeBC4_p_c23323_g2_i3      | Sh14Contig_3290  | diphthamide biosynthesis protein 2-like                     |
| StHeBC4_p_c18975_g7_i10     | Sh14Contig_7369  | None                                                        |
| StHeBC4_p_c12903_g4626_i6   | Sh14Contig_4698  | retrotransposon protein                                     |
| None                        | Sh14Contig_80867 | None                                                        |
| StHeBC4_h_c11261_g0_i2      | Sh14Contig_13520 | chemocyanin precursor                                       |
| StHeBC4_p_c23585_g1_i4      | Sh14Contig_1911  | None                                                        |
| StHeBC4_p_c24979_g0_i1      | Sh14Contig_4792  | 97 kda heat shock protein                                   |
| StHeBC4_h_c12903_g23955_i1  | Sh14Contig_45458 | gag-protease polyprotein                                    |

|                             |                  |                                                             |
|-----------------------------|------------------|-------------------------------------------------------------|
| StHeBC4_u_c12903_g1547_i1   | Sh14Contig_68469 | None                                                        |
| None                        | Sh14Contig_48379 | None                                                        |
| StHeBC4_p_c12903_g30160_i1  | Sh14Contig_57886 | None                                                        |
| None                        | Sh14Contig_64011 | None                                                        |
| None                        | Sh14Contig_1642  | retrotransposon ty1-copia subclass                          |
| StHeBC4_p_c22011_g3_i2      | Sh14Contig_15531 | wd repeat-containing protein 26-like                        |
| StHeBC4_p_c12903_g7195_i9   | Sh14Contig_60490 | unnamed protein product                                     |
| StHeBC4_h_c24484_g1_i2      | Sh14Contig_42033 | hypothetical protein VITISV_042364                          |
| StHeBC4_p_c20621_g7_i3      | Sh14Contig_4748  | gag-pol precursor                                           |
| StHeBC4_u_c12903_g27039_i4  | Sh14Contig_4713  | pectin methylesterase                                       |
| StHeBC4_p_c18975_g7_i5      | Sh14Contig_7369  | None                                                        |
| None                        | Sh14Contig_65419 | None                                                        |
| StHeBC4_u_c12903_g32907_i15 | Sh14Contig_29096 | None                                                        |
| None                        | Sh14Contig_52781 | None                                                        |
| StHeBC4_p_c12903_g208_i2    | Sh14Contig_7920  | None                                                        |
| StHeBC4_p_c12903_g22741_i4  | Sh14Contig_9532  | pattern formation                                           |
| StHeBC4_p_c12903_g38175_i2  | Sh14Contig_17588 | ring zinc finger ankyrin protein                            |
| None                        | Sh14Contig_4395  | unnamed protein product [Vitis vinifera]                    |
| StHeBC4_u_c12903_g34427_i3  | Sh14Contig_46360 | None                                                        |
| StHeBC4_h_c11261_g0_i1      | Sh14Contig_13520 | chemocyanin precursor                                       |
| StHeBC4_h_c12903_g40212_i2  | Sh14Contig_24771 | copia ltr rider                                             |
| StHeBC4_p_c13584_g0_i1      | Sh14Contig_33358 | None                                                        |
| StHeBC4_u_c12903_g16409_i3  | Sh14Contig_576   | atp-dependent helicase brm-like                             |
| StHeBC4_h_c11483_g0_i1      | Sh14Contig_55439 | FAR1; Zinc finger, SWIM-type                                |
| StHeBC4_p_c12903_g20722_i11 | Sh14Contig_28640 | PREDICTED: uncharacterized protein<br>LOC100854178, partial |
| StHeBC4_h_c12903_g12703_i2  | Sh14Contig_9184  | photosystem ii cp43 chlorophyll apoprotein                  |
| StHeBC4_p_c12903_g2185_i1   | Sh14Contig_12790 | None                                                        |
| StHeBC4_p_c12903_g34644_i1  | Sh14Contig_4585  | trehalose-phosphatase synthase 2                            |
| StHeBC4_p_c24106_g0_i1      | Sh14Contig_40210 | None                                                        |
| StHeBC4_h_c18968_g1_i5      | Sh14Contig_1642  | retrotransposon ty1-copia subclass                          |
| StHeBC4_u_c3088_g0_i1       | Sh14Contig_31622 | None                                                        |
| StHeBC4_u_c12903_g35782_i1  | Sh14Contig_27773 | None                                                        |
| None                        | Sh14Contig_23637 | None                                                        |
| StHeBC4_u_c19051_g0_i1      | Sh14Contig_63267 | None                                                        |
| None                        | Sh14Contig_11046 | uncharacterized protein loc100253271                        |
| StHeBC4_u_c12903_g27691_i1  | Sh14Contig_35466 | None                                                        |
| StHeBC4_u_c22214_g0_i6      | Sh14Contig_43769 | None                                                        |
| StHeBC4_u_c12903_g1736_i12  | Sh14Contig_28260 | None                                                        |
| None                        | Sh14Contig_58406 | None                                                        |
| StHeBC4_u_c26755_g1_i1      | Sh14Contig_68980 | None                                                        |
| StHeBC4_p_c26987_g0_i1      | Sh14Contig_48    | 6-4 photolyase                                              |
| StHeBC4_u_c16917_g1_i1      | Sh14Contig_50405 | None                                                        |
| StHeBC4_u_c22344_g0_i6      | Sh14Contig_813   | thaumatin-like protein                                      |
| StHeBC4_u_c12903_g699_i2    | Sh14Contig_58790 | None                                                        |
| StHeBC4_p_c12903_g14484_i1  | Sh14Contig_12513 | None                                                        |
| StHeBC4_p_c9911_g3_i3       | Sh14Contig_54171 | predicted protein                                           |
| None                        | Sh14Contig_7920  | None                                                        |
| StHeBC4_u_c12903_g34427_i8  | Sh14Contig_46360 | None                                                        |

|                             |                  |                                                         |
|-----------------------------|------------------|---------------------------------------------------------|
| StHeBC4_p_c12903_g35474_i1  | Sh14Contig_4481  | None                                                    |
| None                        | Sh14Contig_43642 | None                                                    |
| StHeBC4_u_c12903_g15888_i3  | Sh14Contig_81511 | None                                                    |
| StHeBC4_p_c24979_g1_i1      | Sh14Contig_4792  | 97 kda heat shock protein                               |
| StHeBC4_p_c12903_g14483_i5  | Sh14Contig_16250 | tcp transcription factor 13                             |
| StHeBC4_p_c12903_g6756_i1   | Sh14Contig_12790 | None                                                    |
| StHeBC4_p_c12903_g10875_i1  | Sh14Contig_20081 | beta-glucan-binding protein                             |
| StHeBC4_p_c17648_g0_i3      | Sh14Contig_15582 | e3 ubiquitin-protein ligase upl3                        |
| StHeBC4_u_c12903_g22225_i1  | Sh14Contig_48959 | None                                                    |
| None                        | Sh14Contig_45784 | None                                                    |
| None                        | Sh14Contig_75797 | None                                                    |
| StHeBC4_u_c12903_g11727_i4  | Sh14Contig_4041  | None                                                    |
| StHeBC4_p_c23083_g3_i1      | Sh14Contig_37240 | None                                                    |
| None                        | Sh14Contig_5997  | None                                                    |
| None                        | Sh14Contig_67788 | None                                                    |
| StHeBC4_p_c12903_g6756_i1   | Sh14Contig_1062  | None                                                    |
| StHeBC4_u_c12903_g11833_i1  | Sh14Contig_14842 | None                                                    |
| StHeBC4_p_c12903_g6700_i3   | Sh14Contig_43681 | hypothetical protein VITISV_013115                      |
| StHeBC4_p_c20608_g0_i7      | Sh14Contig_35726 | PREDICTED: putative kinase-like protein<br>TMKL1-like   |
| None                        | Sh14Contig_29426 | None                                                    |
| None                        | Sh14Contig_70066 | None                                                    |
| StHeBC4_u_c12903_g29964_i1  | Sh14Contig_37086 | None                                                    |
| StHeBC4_p_c12903_g39295_i4  | Sh14Contig_19126 | epoxide hydrolase 2-like                                |
| StHeBC4_u_c12903_g1736_i13  | Sh14Contig_29803 | None                                                    |
| None                        | Sh14Contig_29803 | None                                                    |
| StHeBC4_p_c12903_g6843_i1   | Sh14Contig_4375  | translation initiation factor eif-2b subunit delta-like |
| StHeBC4_u_c12903_g1736_i7   | Sh14Contig_28260 | None                                                    |
| StHeBC4_p_c12903_g38577_i4  | Sh14Contig_21342 | None                                                    |
| StHeBC4_p_c25304_g0_i1      | Sh14Contig_5367  | serine threonine-protein kinase pbs1-like               |
| StHeBC4_u_c12903_g1736_i12  | Sh14Contig_28260 | None                                                    |
| StHeBC4_p_c12903_g7992_i1   | Sh14Contig_22515 | poly-specific ribonuclease parn                         |
| StHeBC4_u_c12903_g4208_i1   | Sh14Contig_47575 | None                                                    |
| StHeBC4_p_c11471_g0_i1      | Sh14Contig_66224 | None                                                    |
| StHeBC4_p_c12903_g40108_i1  | Sh14Contig_17925 | upf0326 protein at4g17486-like                          |
| StHeBC4_p_c26825_g3_i2      | Sh14Contig_30816 | unnamed protein product                                 |
| StHeBC4_u_c17841_g0_i1      | Sh14Contig_54135 | None                                                    |
| StHeBC4_h_c12903_g30936_i1  | Sh14Contig_28702 | copla LTR rider                                         |
| None                        | Sh14Contig_37720 | None                                                    |
| StHeBC4_p_c12903_g10585_i1  | Sh14Contig_12790 | None                                                    |
| StHeBC4_u_c14956_g0_i2      | Sh14Contig_3380  | None                                                    |
| StHeBC4_u_c12903_g19836_i1  | Sh14Contig_44128 | None                                                    |
| StHeBC4_p_c12903_g9452_i3   | Sh14Contig_68177 | None                                                    |
| StHeBC4_p_c21038_g1_i1      | Sh14Contig_46012 | None                                                    |
| StHeBC4_u_c12903_g35474_i11 | Sh14Contig_4481  | None                                                    |
| StHeBC4_p_c12903_g15810_i1  | Sh14Contig_12790 | None                                                    |
| StHeBC4_u_c12903_g1736_i7   | Sh14Contig_28260 | None                                                    |
| StHeBC4_u_c12903_g34427_i1  | Sh14Contig_61194 | None                                                    |

|                            |                  |                                                            |
|----------------------------|------------------|------------------------------------------------------------|
| StHeBC4_p_c18569_g2_i14    | Sh14Contig_67725 | None                                                       |
| StHeBC4_u_c22214_g0_i2     | Sh14Contig_43769 | None                                                       |
| StHeBC4_p_c18975_g4_i3     | Sh14Contig_77966 | hypothetical protein VITISV_037041                         |
| StHeBC4_p_c22472_g0_i1     | Sh14Contig_63886 | predicted protein                                          |
| StHeBC4_u_c24133_g4_i1     | Sh14Contig_30270 | None                                                       |
| StHeBC4_u_c12903_g12274_i1 | Sh14Contig_5997  | None                                                       |
| None                       | Sh14Contig_267   | None                                                       |
| StHeBC4_u_c12903_g34427_i3 | Sh14Contig_31554 | None                                                       |
| StHeBC4_p_c12903_g33372_i2 | Sh14Contig_18809 | serine threonine protein kinase                            |
| StHeBC4_p_c12903_g12842_i2 | Sh14Contig_58393 | hypothetical protein VITISV_012059                         |
| StHeBC4_p_c12903_g13577_i4 | Sh14Contig_4336  | retrotransposon unclassified                               |
| StHeBC4_u_c12903_g34427_i9 | Sh14Contig_46360 | None                                                       |
| StHeBC4_u_c20739_g0_i7     | Sh14Contig_30629 | None                                                       |
| None                       | Sh14Contig_64863 | None                                                       |
| StHeBC4_u_c18975_g2_i1     | Sh14Contig_7369  | None                                                       |
| StHeBC4_u_c3227_g1_i1      | Sh14Contig_65419 | None                                                       |
| StHeBC4_u_c18360_g0_i1     | Sh14Contig_44903 | None                                                       |
| StHeBC4_p_c12903_g6756_i1  | Sh14Contig_1062  | None                                                       |
| StHeBC4_p_c12903_g20268_i2 | Sh14Contig_73193 | None                                                       |
| StHeBC4_p_c12903_g15476_i8 | Sh14Contig_78156 | None                                                       |
| StHeBC4_u_c12903_g29964_i1 | Sh14Contig_35346 | None                                                       |
| None                       | Sh14Contig_62455 | None                                                       |
| None                       | Sh14Contig_11292 | None                                                       |
| StHeBC4_p_c12903_g43157_i2 | Sh14Contig_5125  | None                                                       |
| None                       | Sh14Contig_71030 | None                                                       |
| StHeBC4_u_c12903_g18073_i1 | Sh14Contig_20326 | None                                                       |
| StHeBC4_p_c17480_g0_i1     | Sh14Contig_62447 | None                                                       |
| StHeBC4_p_c18975_g4_i6     | Sh14Contig_44012 | F7F22.15, related                                          |
| StHeBC4_p_c12903_g32577_i4 | Sh14Contig_50541 | None                                                       |
| None                       | Sh14Contig_78156 | None                                                       |
| StHeBC4_u_c12903_g32032_i1 | Sh14Contig_20326 | None                                                       |
| StHeBC4_u_c12903_g25724_i1 | Sh14Contig_32318 | None                                                       |
| StHeBC4_u_c13414_g0_i1     | Sh14Contig_61194 | None                                                       |
| None                       | Sh14Contig_43845 | None                                                       |
| None                       | Sh14Contig_37580 | None                                                       |
| StHeBC4_u_c12903_g1736_i12 | Sh14Contig_28260 | None                                                       |
| StHeBC4_p_c12903_g17146_i3 | Sh14Contig_34580 | None                                                       |
| StHeBC4_p_c12903_g33830_i2 | Sh14Contig_22568 | None                                                       |
| StHeBC4_p_c12903_g18700_i3 | Sh14Contig_2850  | None                                                       |
| None                       | Sh14Contig_61087 | retrotransposon protein, putative, Ty3-gypsy subclass      |
| StHeBC4_p_c12903_g208_i2   | Sh14Contig_7920  | None                                                       |
| StHeBC4_u_c14380_g6_i22    | Sh14Contig_20089 | None                                                       |
| StHeBC4_p_c12903_g22518_i1 | Sh14Contig_39552 | None                                                       |
| StHeBC4_u_c18188_g0_i1     | Sh14Contig_30718 | retrotransposon protein, putative, unclassified, expressed |
| StHeBC4_u_c12903_g35782_i1 | Sh14Contig_27773 | None                                                       |
| None                       | Sh14Contig_53940 | None                                                       |
| None                       | Sh14Contig_29803 | None                                                       |

|                             |      |      |
|-----------------------------|------|------|
| StHeBC4_p_c20119_g0_i1      | None | None |
| StHeBC4_p_c12903_g26306_i42 | None | None |
| StHeBC4_u_c12903_g15888_i8  | None | None |
| StHeBC4_u_c12903_g34326_i2  | None | None |
| StHeBC4_u_c22214_g0_i5      | None | None |
| StHeBC4_u_c12903_g32907_i15 | None | None |
| StHeBC4_p_c15477_g0_i2      | None | None |
| StHeBC4_p_c12903_g18330_i2  | None | None |
| StHeBC4_u_c20631_g2_i1      | None | None |
| StHeBC4_u_c18975_g1_i1      | None | None |
| StHeBC4_p_c12903_g33550_i2  | None | None |
| StHeBC4_u_c20348_g0_i3      | None | None |
| StHeBC4_u_c19161_g0_i1      | None | None |
| StHeBC4_p_c18860_g2_i3      | None | None |
| StHeBC4_p_c12903_g5434_i1   | None | None |
| StHeBC4_p_c12903_g34427_i2  | None | None |
| StHeBC4_u_c12903_g14239_i1  | None | None |
| StHeBC4_p_c12903_g16488_i2  | None | None |
| StHeBC4_u_c20110_g5_i1      | None | None |
| StHeBC4_u_c17278_g0_i2      | None | None |
| StHeBC4_p_c18569_g0_i2      | None | None |
| StHeBC4_p_c12903_g15860_i11 | None | None |
| StHeBC4_u_c12903_g16409_i1  | None | None |
| StHeBC4_p_c12903_g5042_i2   | None | None |
| StHeBC4_u_c12903_g42940_i10 | None | None |
| StHeBC4_u_c18975_g1_i1      | None | None |
| StHeBC4_u_c12903_g34427_i1  | None | None |
| StHeBC4_u_c13012_g0_i1      | None | None |
| StHeBC4_u_c20371_g0_i1      | None | None |
| StHeBC4_u_c22472_g0_i4      | None | None |
| StHeBC4_u_c12903_g34431_i3  | None | None |
| StHeBC4_p_c18860_g2_i4      | None | None |
| StHeBC4_p_c12903_g15230_i2  | None | None |
| StHeBC4_u_c18860_g2_i48     | None | None |
| StHeBC4_p_c12903_g8484_i1   | None | None |
| StHeBC4_u_c18238_g1_i1      | None | None |
| StHeBC4_u_c25350_g7_i2      | None | None |
| StHeBC4_u_c12903_g29135_i2  | None | None |
| StHeBC4_u_c13414_g0_i1      | None | None |
| StHeBC4_p_c16184_g0_i1      | None | None |
| StHeBC4_p_c12903_g27140_i4  | None | None |
| StHeBC4_p_c12903_g18100_i3  | None | None |
| StHeBC4_p_c26242_g21_i7     | None | None |
| StHeBC4_u_c12903_g15860_i5  | None | None |
| StHeBC4_p_c12903_g33449_i1  | None | None |
| StHeBC4_u_c13012_g0_i1      | None | None |
| StHeBC4_h_c10541_g0_i1      | None | None |
| StHeBC4_u_c12903_g33428_i2  | None | None |
| StHeBC4_u_c12903_g1552_i1   | None | None |

|                            |      |      |
|----------------------------|------|------|
| StHeBC4_p_c16622_g1_i2     | None | None |
| StHeBC4_p_c12903_g8677_i10 | None | None |
| StHeBC4_u_c10677_g0_i1     | None | None |
| StHeBC4_p_c12903_g40108_i1 | None | None |
| StHeBC4_u_c12903_g15860_i5 | None | None |
| StHeBC4_p_c19033_g0_i1     | None | None |
| StHeBC4_p_c12903_g33830_i1 | None | None |
| StHeBC4_p_c12903_g11366_i6 | None | None |
| StHeBC4_u_c12903_g25897_i6 | None | None |

---

860

861 **Table S3.** Chemocyanin variant calls for sequenced individuals. Individuals are coded as '1' if  
 862 they possess the 'finger millet' allele or '0' if the allele is missing.

| SampleID | Site      | Host          | Lat        | Lon      | Elevation_ft | Chemocyanin |
|----------|-----------|---------------|------------|----------|--------------|-------------|
| SH009    | Mumias    | maize         | 0.3342     | 34.47782 | 4306         | 0           |
| SH014    | Mumias    | maize         | 0.3342     | 34.47782 | 4306         | 0           |
| SH023    | Mumias2   | maize         | 0.3038     | 34.50713 | 4299         | 1           |
| SH027    | Mumias2   | maize         | 0.3038     | 34.50713 | 4299         | 0           |
| SH031    | Mumias2   | maize         | 0.3038     | 34.50713 | 4299         | 0           |
| SH035    | Kibos     | sorghum       | -0.0363167 | 34.81567 | 3893         | 1           |
| SH039    | Kibos     | sorghum       | -0.0363167 | 34.81567 | 3893         | 0           |
| SH042    | Kibos     | sorghum       | -0.0363167 | 34.81567 | 3893         | 1           |
| SH046    | Kibos     | maize         | -0.0341417 | 34.81628 | 3917         | 0           |
| SH055    | Kibos     | maize         | -0.0341417 | 34.81628 | 3917         | 0           |
| SH065    | Muhoroni2 | maize         | -0.15125   | 35.19167 | 4239         | 0           |
| SH070    | Muhoroni2 | maize         | -0.15125   | 35.19167 | 4239         | 0           |
| SH072    | Muhoroni2 | sugarcane     | -0.15125   | 35.19167 | 4239         | 0           |
| SH074    | Muhoroni2 | sugarcane     | -0.15125   | 35.19167 | 4239         | 1           |
| SH077    | Muhoroni2 | sugarcane     | -0.15125   | 35.19167 | 4239         | 0           |
| SH079    | Chemelil  | maize         | -0.082375  | 35.13167 | 4176         | 0           |
| SH087    | Chemelil  | maize         | -0.082375  | 35.13167 | 4176         | 1           |
| SH091    | Chemelil2 | sorghum       | -0.0941667 | 35.12495 | 4060         | 0           |
| SH097    | Chemelil2 | sorghum       | -0.0941667 | 35.12495 | 4060         | 1           |
| SH101    | Chemelil2 | sorghum       | -0.0941667 | 35.12495 | 4060         | 0           |
| SH103    | Kisii     | finger millet | -0.6138    | 34.73172 | 4925         | 1           |
| SH104    | Kisii     | finger millet | -0.6138    | 34.73172 | 4925         | 1           |
| SH105    | Kisii     | finger millet | -0.6138    | 34.73172 | 4925         | 1           |
| SH106    | Kisii     | finger millet | -0.6138    | 34.73172 | 4925         | 1           |
| SH107    | Kisii     | finger millet | -0.6138    | 34.73172 | 4925         | 1           |
| SH108    | Kisii     | finger millet | -0.6138    | 34.73172 | 4925         | 1           |
| SH109    | Kisii     | finger millet | -0.6138    | 34.73172 | 4925         | 1           |
| SH110    | Kisii     | finger millet | -0.6138    | 34.73172 | 4925         | 1           |
| SH111    | Kisii     | finger millet | -0.6138    | 34.73172 | 4925         | 1           |
| SH112    | Kisii     | finger millet | -0.6138    | 34.73172 | 4925         | 0           |
| SH113    | Kisii     | finger millet | -0.6138    | 34.73172 | 4925         | 0           |
| SH114    | Kisii     | finger millet | -0.6138    | 34.73172 | 4925         | 0           |
| SH115    | Kisii     | maize         | -0.6133167 | 34.7318  | 4930         | 0           |
| SH116    | Kisii     | maize         | -0.6133167 | 34.7318  | 4930         | 0           |
| SH117    | Kisii     | maize         | -0.6133167 | 34.7318  | 4930         | 0           |
| SH118    | Kisii     | maize         | -0.6133167 | 34.7318  | 4930         | 0           |
| SH119    | Kisii     | maize         | -0.6133167 | 34.7318  | 4930         | 0           |
| SH120    | Kisii     | maize         | -0.6133167 | 34.7318  | 4930         | 0           |
| SH121    | Kisii     | maize         | -0.6133167 | 34.7318  | 4930         | 0           |
| SH122    | Kisii     | maize         | -0.6133167 | 34.7318  | 4930         | 0           |
| SH123    | Kisii     | maize         | -0.6133167 | 34.7318  | 4930         | 0           |
| SH124    | Kisii     | maize         | -0.6133167 | 34.7318  | 4930         | 0           |
| SH125    | Kisii     | maize         | -0.6133167 | 34.7318  | 4930         | 0           |
| SH126    | Kisii     | maize         | -0.6133167 | 34.7318  | 4930         | 0           |
| SH127    | Homa Bay  | sorghum       | -0.5839667 | 34.4762  | 4173         | 0           |



|       |            |         |            |          |      |   |
|-------|------------|---------|------------|----------|------|---|
| SH128 | Homa Bay   | sorghum | -0.5839667 | 34.4762  | 4173 | 0 |
| SH129 | Homa Bay   | sorghum | -0.5839667 | 34.4762  | 4173 | 0 |
| SH130 | Homa Bay   | sorghum | -0.5839667 | 34.4762  | 4173 | 0 |
| SH131 | Homa Bay   | sorghum | -0.5839667 | 34.4762  | 4173 | 0 |
| SH132 | Homa Bay   | sorghum | -0.5839667 | 34.4762  | 4173 | 0 |
| SH133 | Homa Bay   | sorghum | -0.5839667 | 34.4762  | 4173 | 1 |
| SH134 | Homa Bay   | sorghum | -0.5839667 | 34.4762  | 4173 | 0 |
| SH135 | Homa Bay   | sorghum | -0.5839667 | 34.4762  | 4173 | 0 |
| SH136 | Homa Bay   | sorghum | -0.5839667 | 34.4762  | 4173 | 0 |
| SH137 | Homa Bay   | sorghum | -0.5839667 | 34.4762  | 4173 | 0 |
| SH138 | Homa Bay   | sorghum | -0.5839667 | 34.4762  | 4173 | 0 |
| SH139 | Homa Bay 2 | maize   | -0.5834    | 34.47635 | 4161 | 0 |
| SH140 | Homa Bay 2 | maize   | -0.5834    | 34.47635 | 4161 | 0 |
| SH141 | Homa Bay 2 | maize   | -0.5834    | 34.47635 | 4161 | 0 |
| SH142 | Homa Bay 2 | maize   | -0.5834    | 34.47635 | 4161 | 1 |
| SH143 | Homa Bay 2 | maize   | -0.5834    | 34.47635 | 4161 | 1 |
| SH144 | Homa Bay 2 | maize   | -0.5834    | 34.47635 | 4161 | 0 |
| SH145 | Homa Bay 2 | maize   | -0.5834    | 34.47635 | 4161 | 1 |
| SH146 | Homa Bay 2 | maize   | -0.5834    | 34.47635 | 4161 | 0 |
| SH147 | Homa Bay 2 | maize   | -0.5834    | 34.47635 | 4161 | 0 |
| SH148 | Homa Bay 2 | maize   | -0.5834    | 34.47635 | 4161 | 0 |
| SH149 | Homa Bay 2 | maize   | -0.5834    | 34.47635 | 4161 | 0 |
| SH150 | Homa Bay 2 | maize   | -0.5834    | 34.47635 | 4161 | 0 |

863

864

865 **FIGURE LEGENDS**

866

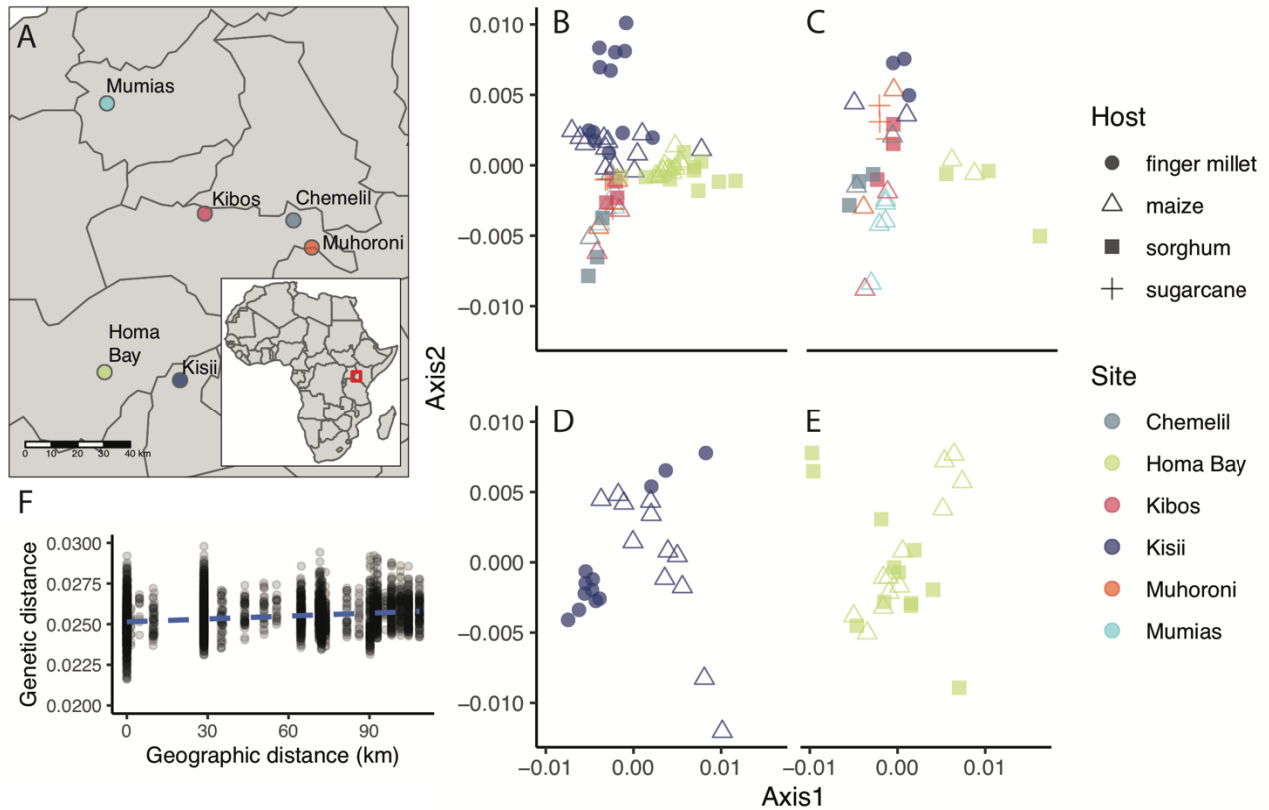

867

868 **Figure 1.** Population genomics of *S. hermonthica* from western Kenya. A) Map of the six

869 sampling locations. (B-E) Principal Coordinates Analysis (PCoA) based on *k*-mer-derived

870 genomic distances, performed separately for B) all sampled individuals ( $n = 68$ ), C) five

871 individuals per location ( $n = 30$ ), D) individuals from Kisii ( $n = 24$ ), and E) individuals from Homa

872 Bay ( $n = 24$ ). F) Genetic vs. geographic distance. Genetic distance was based on 31-mers. The

873 dashed blue line indicates expectations from the best fit line ( $y = 0.000013 * km + 0.0246$ ;  $R^2 =$

874 0.05) for  $n = 4,556$  pairwise comparisons among different individuals.

875

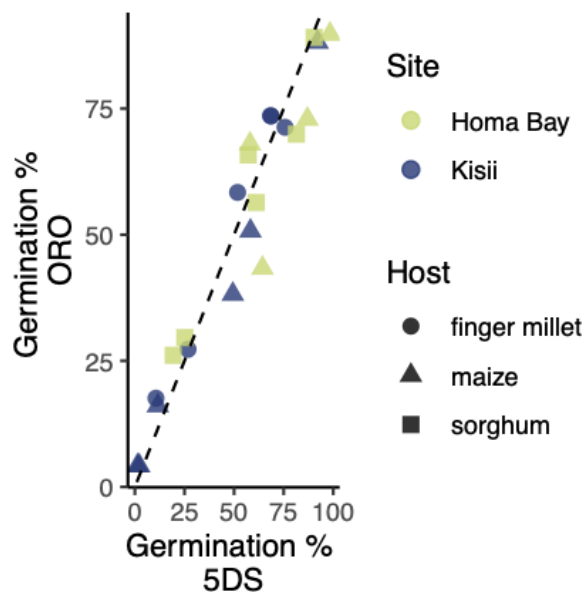

876

877 **Figure 2.** Germination response variation in Homa Bay and Kisii populations. Seeds from  $n = 6$   
878 individuals per unique site and host were tested in response to synthetic strigolactones  
879 orobanchol (ORO, 0.01  $\mu$ M) and 5-deoxystrigol (5DS, 0.01  $\mu$ M). The dashed line indicates the  
880 expectation if the percent germination in response to the two different germination stimulants is  
881 identical.

882

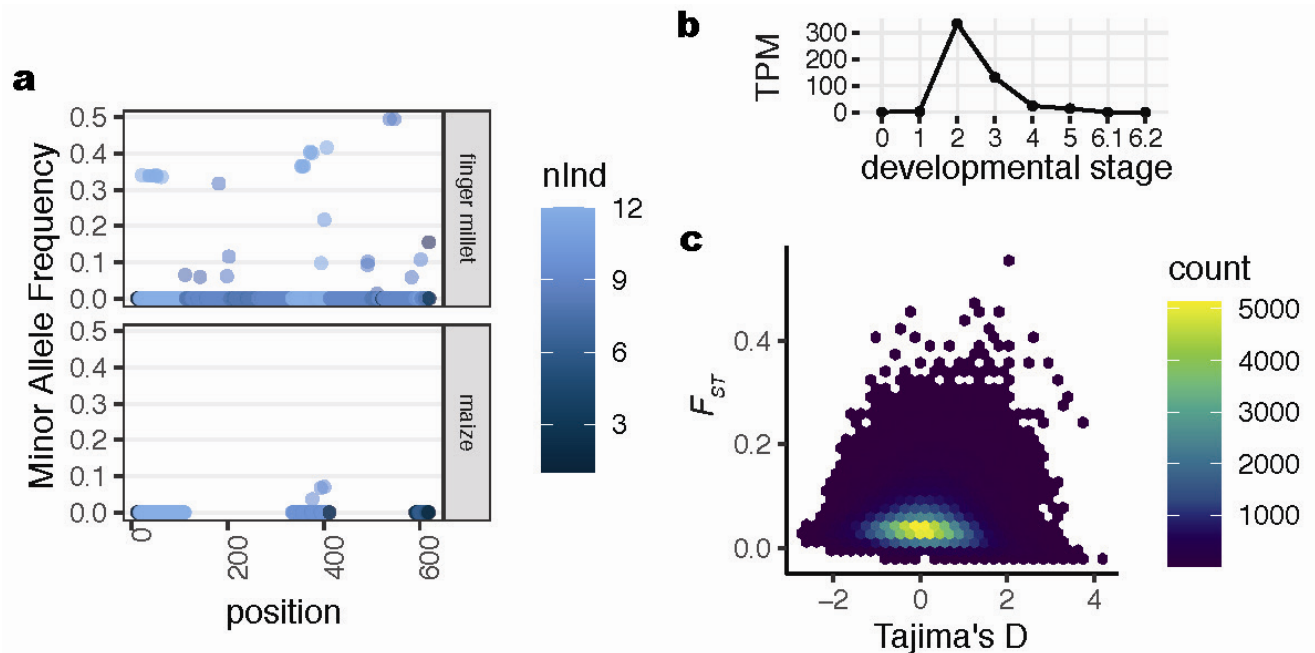

883

884 **Figure 3.** Genetic variation in *Striga hermonthica* from Kisii, Kenya. (a) Presence/absence

885 variation across the chemocyanin precursor transcript (StHeBC4\_h\_c11261\_g0\_i1), for  $n = 12$

886 individuals per host (finger millet or maize). If the locus is not present in any of the sequenced

887 individuals, no data point is shown, otherwise each point is colored according to the number of

888 individuals (nInd) with data for the position. (b) Gene expression data in transcripts per million

889 (TPM) from the PPGPII dataset for the chemocyanin precursor transcript across six stages of

890 haustorial development (0: imbibed seed; 1: germinated seedling after exposure to GR24; 2:

891 germinated seedling after exposure to DMBQ; 3: ~48 hrs post-attachment; 4: ~72 hrs post-

892 attachment; 5: late post-attachment; 6.1: vegetative structures; 6.2: reproductive structures). (c)

893 Distribution of Tajima's D and  $F_{ST}$  values across 154,722 non-overlapping 1-kb windows. Only

894 windows with data for more than 50% of sites are shown, excluding impacts of structural genetic

895 variation as in (a). Tajima's D for the chemocyanin was -1.7.
